# Supplementary material for: One-pot C–C/C–O bond formation: synthesis of spirocyclic lactones
Source: Royal Society of Chemistry journal article supplement (doi:10.1039/c5ra22684h), 2015-12-02

## ***Supporting Information:***

### **One-Pot C–C/C–O Bonds Formation: Synthesis of Spirocyclic Lactones**

Pedireddi Niharika and Gedu Satyanarayana\*

Department of Chemistry, Indian Institute of Technology, Hyderabad

Kandi – 502 285, Sangareddy, Telangana, INDIA

Phone: (040) 2301 6033; Fax: (040) 2301 6003 /32

E-mail: [gvsatya@iith.ac.in](mailto:gvsatya@iith.ac.in)

<sup>1</sup>H-NMR and <sup>13</sup>C-NMR spectra for all new compounds

S15-S37

## Experimental Section

**General:** IR spectra were recorded on a Bruker Tensor 37 (FTIR) spectrophotometer.  $^1\text{H}$  NMR spectra were recorded on Bruker Avance 400 (400 MHz) spectrometer at 295 K in  $\text{CDCl}_3$ ; chemical shifts ( $\delta$  ppm) and coupling constants (J in Hz) are reported in standard fashion with reference to either internal standard tetramethylsilane (TMS) ( $\delta_{\text{H}} = 0.00$  ppm) or  $\text{CHCl}_3$  ( $\delta_{\text{H}} = 7.25$  ppm).  $^{13}\text{C}$  NMR spectra were recorded on Bruker Avance 400 (100 MHz) spectrometer at RT in  $\text{CDCl}_3$ ; chemical shifts ( $\delta$  in ppm) are reported relative to  $\text{CHCl}_3$  [ $\delta_{\text{C}} = 77.00$  ppm (central line of triplet)]. In the  $^{13}\text{C}$  NMR, the nature of carbons (C, CH,  $\text{CH}_2$  and  $\text{CH}_3$ ) was determined by recording the DEPT-135 spectra, and is given in parentheses and noted as s = singlet (for C), d = doublet (for CH), t = triplet (for  $\text{CH}_2$ ) and q = quartet (for  $\text{CH}_3$ ). In the  $^1\text{H}$ -NMR, the following abbreviations were used throughout: s = singlet, d = doublet, t = triplet, q = quartet, qui = quintet, m = multiplet and br. s = broad singlet. The assignment of signals was confirmed by  $^1\text{H}$ ,  $^{13}\text{C}$  CPD and DEPT spectra. High-resolution mass spectra (HR-MS) were recorded on an Agilent 6538 UHD Q-TOF using multimode source. All small scale dry reactions were carried out using standard syringe-septum technique. Regarding Horner-Wadsworth-Emmons reaction, TEPA from Avra Synthesis with a purity of 98%, NaH from Sigma-Aldrich (60% immersion in mineral oil), and benzaldehydes/acetophenones from Sisco Research Laboratories having 97-98% purity were used. Solvent THF was dried over sodium metal. Similarly, for cyclization reaction anhydrous  $\text{FeCl}_3$  from Merck Chemicals and phenols from Sisco Research Laboratories were used. DCE was dried over calcium hydride and used. Reactions were monitored by TLC on silica gel using a mixture of petroleum ether and ethyl acetate as eluents. Reactions were generally run under an argon or nitrogen atmosphere. Solvents were distilled prior use; petroleum ether with a boiling range of 60 to 80 °C was used. Acme's silica gel (60–120 mesh) was used for column chromatography (approximately 20 g per one gram of crude material).

**General Procedure (GP) for Cyclization:** To an oven dried schlenk tube under nitrogen atmosphere,  $\alpha,\beta$ -unsaturated ester **8** or **11** (77–146 mg, 0.5 mmol), phenol **9** (141–216 mg, 1.5 mmol) and anhydrous  $\text{FeCl}_3$  (243 mg, 1.5 mmol) were added followed by benzene (1.5 mL). The resulting reaction mixture was stirred at rt for 12 h. Progress of the reaction was monitored by TLC until the reaction was completed. The reaction mixture was quenched by the addition of aqueous  $\text{NaHCO}_3$  and extracted in ethyl acetate ( $3 \times 20$  mL). The combined organic layers were dried ( $\text{Na}_2\text{SO}_4$ ) and concentrated in *vacuo*. Purification of the residue on silica gel column chromatography using petroleum ether/ethyl acetate as eluent furnished novel spiro lactones **10** & **12** (45–87%) as viscous liquid/solid.

The required  $\alpha,\beta$ -unsaturated esters **8a**, **8b**, **8c**, **11a**, **11b**, **11c**, **11d** and **11e** were prepared and known in the literature.<sup>1</sup>

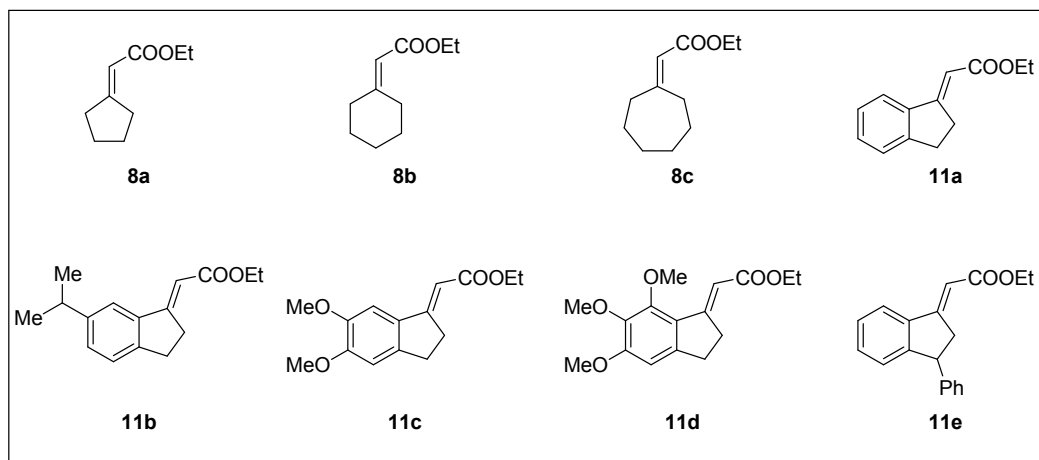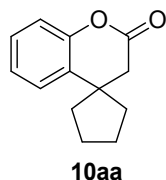

**Spiro[chromene-4,1'-cyclopentan]-2(3H)-one (10aa):** GP was carried out on the ester **8a** (77 mg, 0.5 mmol), phenol **9a** (141.0 mg, 1.5 mmol), anhydrous  $\text{FeCl}_3$  (243 mg, 1.5 mmol) and benzene (1.5 mL). The resulting reaction mixture was stirred at rt for 12 h. [TLC control  $R_f(\mathbf{8a})=0.83$ ,  $R_f(\mathbf{10aa})=0.66$ , (petroleum ether/ethyl acetate 98:2, UV detection)]. Purification of the residue on silica gel column chromatography (petroleum ether/ethyl acetate 100:0 to 98:2 as eluent) furnished the lactone **10aa** (51 mg, 51%) as viscous liquid. IR (MIR-ATR, 4000–600  $\text{cm}^{-1}$ ):  $\nu_{\text{max}}=3054, 1767, 1422, 1264, 895, 731 \text{ cm}^{-1}$ .  $^1\text{H NMR}$  ( $\text{CDCl}_3$ , 400 MHz):  $\delta=7.30\text{--}7.20$  (m, 2H, ArH), 7.14 (ddd, 1H,  $J=7.8, 7.8$  and 1.5 Hz, ArH), 7.07 (dd, 1H,  $J=7.8$  and 1.5 Hz, ArH), 2.69 (s, 2H,  $\text{CH}_2\text{CO}$ ), 2.05–1.90 (m, 2H,  $2 \times \text{CH}_a\text{H}_b$ ), 1.86 (d, 1H,  $J=10.3$  Hz,  $\text{CH}_a\text{H}_b$ ), 1.85 (d, 1H,  $J=6.8$  Hz,  $\text{CH}_a\text{H}_b$ ), 1.83 (d, 1H,  $J=7.3$  Hz,  $\text{CH}_a\text{H}_b$ ), 1.82 (d, 1H,  $J=10.3$  Hz,  $\text{CH}_a\text{H}_b$ ), 1.77–1.62 (m, 2H,  $2 \times \text{CH}_a\text{H}_b$ ) ppm.  $^{13}\text{C NMR}$  ( $\text{CDCl}_3$ , 100 MHz):  $\delta=168.4$  (s, O–C=O), 150.9 (s, ArC), 131.5 (s, ArC), 128.0 (d, ArCH), 124.5 ( $2 \times$  d, 2C,  $2 \times$  ArCH), 117.1 (d, ArCH), 43.8 (s,  $\text{C}_q$ ), 41.3 (t,  $\text{CH}_2\text{CO}$ ), 37.8 (t, 2C,  $2 \times \text{CH}_2$ ), 24.5 (t, 2C,  $2 \times \text{CH}_2$ ) ppm. HR-MS (ESI<sup>+</sup>)  $m/z$  calculated for  $[\text{C}_{13}\text{H}_{14}\text{NaO}_2]^+=[\text{M}+\text{Na}]^+$ : 225.0886; found 225.0886.

<sup>1</sup> R. J. Comito, F. G. Finelli and D. W. C. MacMillan, *J. Am. Chem. Soc.*, **2013**, *135*, 9358.

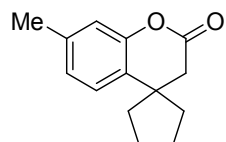

**10ac**

**7-Methylspiro[chromene-4,1'-cyclopentan]-2(3H)-one (10ac):** GP was carried out on the ester **8a** (77 mg, 0.5 mmol), phenol **9c** (162.0 mg, 1.5 mmol), anhydrous FeCl<sub>3</sub> (243 mg, 1.5 mmol) and benzene (1.5 mL). The resulting reaction mixture was stirred at rt for 12 h. [TLC control  $R_f(\mathbf{8a})=0.83$ ,  $R_f(\mathbf{10ac})=0.70$ , (petroleum ether/ethyl acetate 98:2, UV detection)]. Purification of the residue on silica gel column chromatography (petroleum ether/ethyl acetate 100:0 to 98:2 as eluent) furnished the lactone **10ac** (73.2 mg, 68%) as viscous liquid. IR (MIR-ATR, 4000–600 cm<sup>-1</sup>):  $\nu_{max}=2954$ , 1766, 1505, 1415, 1256, 1219, 1166, 966, 815, 776 cm<sup>-1</sup>. <sup>1</sup>H NMR (CDCl<sub>3</sub>, 400 MHz):  $\delta=7.11$  (d, 1H,  $J=7.8$  Hz, ArH), 6.93 (dd, 1H,  $J=7.8$  and 1.0 Hz, ArH), 6.86 (d, 1H,  $J=1.0$  Hz, ArH), 2.65 (s, 2H, CH<sub>2</sub>CO), 2.32 (s, 3H, ArCH<sub>3</sub>), 2.05–1.86 (m, 2H, 2 × CH<sub>a</sub>H<sub>b</sub>), 1.83 (d, 1H,  $J=10.8$  Hz, CH<sub>a</sub>H<sub>b</sub>), 1.82 (d, 1H,  $J=7.3$  Hz, CH<sub>a</sub>H<sub>b</sub>), 1.80 (d, 1H,  $J=6.8$  Hz, CH<sub>a</sub>H<sub>b</sub>), 1.79 (d, 1H,  $J=10.8$  Hz, CH<sub>a</sub>H<sub>b</sub>), 1.75–1.60 (m, 2H, 2 × CH<sub>a</sub>H<sub>b</sub>) ppm. <sup>13</sup>C NMR (CDCl<sub>3</sub>, 100 MHz):  $\delta=168.7$  (s, O–C=O), 150.7 (s, ArC), 138.2 (s, ArC), 128.4 (s, ArC), 125.2 (d, ArCH), 124.3 (d, ArCH), 117.5 (d, ArCH), 43.5 (s, C<sub>q</sub>), 41.4 (t, CH<sub>2</sub>CO), 37.8 (t, 2C, 2 × CH<sub>2</sub>), 24.4 (t, 2C, 2 × CH<sub>2</sub>), 20.9 (q, ArCH<sub>3</sub>) ppm. HR-MS (ESI<sup>+</sup>)  $m/z$  calculated for [C<sub>14</sub>H<sub>17</sub>O<sub>2</sub>]<sup>+</sup>=[M+H]<sup>+</sup>: 217.1223; found 217.1215.

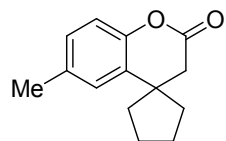

**10ad**

**6-Methylspiro[chromene-4,1'-cyclopentan]-2(3H)-one (10ad):** GP was carried out on the ester **8a** (77 mg, 0.5 mmol), phenol **9d** (162.0 mg, 1.5 mmol), anhydrous FeCl<sub>3</sub> (243 mg, 1.5 mmol) and benzene (1.5 mL). The resulting reaction mixture was stirred at rt for 12 h. [TLC control  $R_f(\mathbf{8a})=0.83$ ,  $R_f(\mathbf{10ad})=0.70$ , (petroleum ether/ethyl acetate 98:2, UV detection)]. Purification of the residue on silica gel column chromatography (petroleum ether/ethyl acetate 100:0 to 98:2 as eluent) furnished the lactone **10ad** (77.0 mg, 71%) as viscous liquid. IR (MIR-ATR, 4000–600 cm<sup>-1</sup>):  $\nu_{max}=2954$ , 1767, 1492, 1416, 1271, 1207, 1153, 822 cm<sup>-1</sup>. <sup>1</sup>H NMR (CDCl<sub>3</sub>, 400 MHz):  $\delta=7.07$ –6.97 (m, 2H, ArH), 6.93 (d, 1H,  $J=8.8$  Hz, ArH), 2.65 (s, 2H, CH<sub>2</sub>CO), 2.33 (s, 3H, ArCH<sub>3</sub>), 2.00–1.87 (m, 2H, 2 × CH<sub>a</sub>H<sub>b</sub>), 1.84 (d, 1H,  $J=10.3$  Hz, CH<sub>a</sub>H<sub>b</sub>), 1.83 (d, 1H,  $J=6.8$  Hz, CH<sub>a</sub>H<sub>b</sub>), 1.81 (d, 1H,  $J=7.3$  Hz, CH<sub>a</sub>H<sub>b</sub>), 1.80 (d, 1H,  $J=10.3$  Hz, CH<sub>a</sub>H<sub>b</sub>), 1.75–1.60 (m, 2H, 2 × CH<sub>a</sub>H<sub>b</sub>) ppm. <sup>13</sup>C NMR (CDCl<sub>3</sub>, 100 MHz):  $\delta=168.6$  (s, O–C=O), 148.8 (s, ArC), 134.0 (s, ArC), 131.1 (s, ArC), 128.4 (d, ArCH), 124.9 (d, ArCH), 116.8 (d, ArCH), 43.7 (s, C<sub>q</sub>), 41.4 (t, CH<sub>2</sub>CO), 37.8 (t, 2C, 2 × CH<sub>2</sub>), 24.5 (t, 2C, 2 × CH<sub>2</sub>), 21.0 (q, ArCH<sub>3</sub>) ppm. HR-MS (ESI<sup>+</sup>)  $m/z$  calculated for [C<sub>14</sub>H<sub>17</sub>O<sub>2</sub>]<sup>+</sup>=[M+H]<sup>+</sup>: 217.1223; found 217.1218.

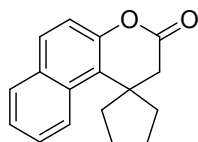

**10af**

**Spiro[benzo[f]chromene-1,1'-cyclopentan]-3(2H)-one (10af):** GP was carried out on the ester **8a** (77 mg, 0.5 mmol), phenol **9f** (216.0 mg, 1.5 mmol), anhydrous FeCl<sub>3</sub> (243 mg, 1.5 mmol) and benzene (1.5 mL). The resulting reaction mixture was stirred at rt for 12 h. [TLC control  $R_f(\mathbf{8a})=0.83$ ,  $R_f(\mathbf{10af})=0.68$ , (petroleum ether/ethyl acetate 97:3, UV detection)]. Purification of the residue on silica gel column chromatography (petroleum ether/ethyl acetate 100:0 to 98:2 as eluent) furnished the lactone **10af** (69 mg, 64%) as viscous liquid. IR (MIR-ATR, 4000–600 cm<sup>-1</sup>):  $\nu_{max}=2924$ , 1766, 1511, 1466, 1257, 1119, 1046, 823 cm<sup>-1</sup>. <sup>1</sup>H NMR (CDCl<sub>3</sub>, 400 MHz):  $\delta=7.98$  (d, 1H,  $J=8.8$  Hz, ArH), 7.84 (d, 1H,  $J=8.3$  Hz, ArH), 7.72 (d, 1H,  $J=8.8$  Hz, ArH), 7.50 (dd, 1H,  $J=8.8$  and 8.3 Hz, ArH), 7.43 (dd, 1H,  $J=8.8$  and 8.3 Hz, ArH), 7.19 (d, 1H,  $J=8.8$  Hz, ArH), 2.78 (s, 2H, CH<sub>2</sub>CO), 2.58–2.45 (m, 2H, CH<sub>2</sub>), 2.20–1.90 (m, 4H, 2 × CH<sub>2</sub>), 1.85–1.70 (m, 2H, CH<sub>2</sub>) ppm. <sup>13</sup>C NMR (CDCl<sub>3</sub>, 100 MHz):  $\delta=167.5$  (s, O–C=O), 149.3 (s, ArC), 131.8 (s, ArC), 130.3 (s, ArC), 129.4 (2 × d, 2C, 2 × ArCH), 126.0 (d, ArCH), 124.4 (d, ArCH), 124.0 (d, ArCH), 123.3 (s, ArC), 117.7 (d, ArCH), 44.8 (s, C<sub>q</sub>), 43.9 (t, CH<sub>2</sub>CO), 39.1 (t, 2C, 2 × CH<sub>2</sub>), 26.6 (t, 2C, 2 × CH<sub>2</sub>) ppm. HR-MS (ESI<sup>+</sup>)  $m/z$  calculated for [C<sub>17</sub>H<sub>16</sub>NaO<sub>2</sub>]<sup>+</sup>=[M+Na]<sup>+</sup>: 275.1043; found 275.1039.

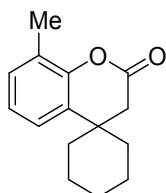

**10bb**

**8-Methylspiro[chromene-4,1'-cyclohexan]-2(3H)-one (10bb):** GP was carried out on the ester **8b** (84 mg, 0.5 mmol), phenol **9b** (162.0 mg, 1.5 mmol), anhydrous FeCl<sub>3</sub> (243 mg, 1.5 mmol) and benzene (1.5 mL). The resulting reaction mixture was stirred at rt for 12 h. [TLC control  $R_f(\mathbf{8b})=0.85$ ,  $R_f(\mathbf{10bb})=0.72$ , (petroleum ether/ethyl acetate 98:2, UV detection)]. Purification of the residue on silica gel column chromatography (petroleum ether/ethyl acetate 100:0 to 98:2 as eluent) furnished the lactone **10bb** (71 mg, 62%) as viscous liquid. IR (MIR-ATR, 4000–600 cm<sup>-1</sup>):  $\nu_{max}=2927$ , 1770, 1460, 1263, 1186, 1155, 919, 749 cm<sup>-1</sup>. <sup>1</sup>H NMR (CDCl<sub>3</sub>, 400 MHz):  $\delta=7.18$  (dd, 1H,  $J=7.8$  and 1.0 Hz, ArH), 7.10 (dd, 1H,  $J=7.3$  and 1.0 Hz, ArH), 7.04 (dd, 1H,  $J=7.8$  and 7.3 Hz, ArH), 2.77 (s, 2H, CH<sub>2</sub>CO), 2.30 (s, 3H, ArCH<sub>3</sub>), 1.83–1.47 (m, 8H, 4 × CH<sub>2</sub>), 1.35–1.22 (m, 2H, CH<sub>2</sub>) ppm. <sup>13</sup>C NMR (CDCl<sub>3</sub>, 100 MHz):  $\delta=168.5$  (s, O–C=O), 149.2 (s, ArC), 132.4 (s, ArC), 129.6 (d, ArCH), 126.4 (s, ArC), 124.2 (d, ArCH), 121.5 (d, ArCH), 37.2 (t, CH<sub>2</sub>CO), 36.2 (s, C<sub>q</sub>), 35.0 (t, 2C, 2 × CH<sub>2</sub>), 25.6 (t, CH<sub>2</sub>), 21.5 (t, 2C, 2 × CH<sub>2</sub>), 16.0 (q, ArCH<sub>3</sub>) ppm. HR-MS (ESI<sup>+</sup>)  $m/z$  calculated for [C<sub>15</sub>H<sub>19</sub>O<sub>2</sub>]<sup>+</sup>=[M+H]<sup>+</sup>: 231.1380; found 231.1373.

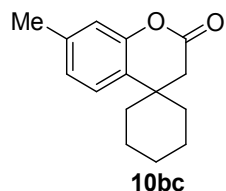

**7-Methylspiro[chromene-4,1'-cyclohexan]-2(3H)-one (10bc):** GP was carried out on the ester **8b** (84 mg, 0.5 mmol), phenol **9c** (162.0 mg, 1.5 mmol), anhydrous FeCl<sub>3</sub> (243 mg, 1.5 mmol) and benzene (1.5 mL). The resulting reaction mixture was stirred at rt for 12 h. [TLC control  $R_f(\mathbf{8b})=0.85$ ,  $R_f(\mathbf{10bc})=0.72$ , (petroleum ether/ethyl acetate 98:2, UV detection)]. Purification of the residue on silica gel column chromatography (petroleum ether/ethyl acetate 100:0 to 98:2 as eluent) furnished the lactone **10bc** (77 mg, 67%) as viscous liquid. IR (MIR-ATR, 4000–600 cm<sup>-1</sup>):  $\nu_{max}=2923, 1767, 1505, 1454, 1416, 1242, 1191, 1155, 953, 815$  cm<sup>-1</sup>. <sup>1</sup>H NMR (CDCl<sub>3</sub>, 400 MHz):  $\delta=7.26$  (d, 1H,  $J=7.8$  Hz, ArH), 6.99 (dd, 1H,  $J=7.8$  and 1.0 Hz, ArH), 6.90 (d, 1H,  $J=1.0$  Hz, ArH), 2.80 (s, 2H, CH<sub>2</sub>CO), 2.36 (s, 3H, ArCH<sub>3</sub>), 1.87–1.45 (m, 9H, 4 × CH<sub>2</sub> and CH<sub>2a</sub>), 1.40–1.25 (m, 1H, CH<sub>2b</sub>) ppm. <sup>13</sup>C NMR (CDCl<sub>3</sub>, 100 MHz):  $\delta=168.6$  (s, O–C=O), 150.8 (s, ArC), 138.3 (s, ArC), 129.6 (s, ArC), 125.4 (d, ArCH), 123.9 (d, ArCH), 117.6 (d, ArCH), 37.5 (t, CH<sub>2</sub>CO), 35.9 (s, C<sub>q</sub>), 35.1 (t, 2C, 2 × CH<sub>2</sub>), 25.6 (t, CH<sub>2</sub>), 21.5 (t, 2C, 2 × CH<sub>2</sub>), 20.9 (q, ArCH<sub>3</sub>) ppm. HR-MS (ESI<sup>+</sup>)  $m/z$  calculated for [C<sub>15</sub>H<sub>18</sub>NaO<sub>2</sub>]<sup>+</sup>=[M+Na]<sup>+</sup>: 253.1199; found 253.1194.

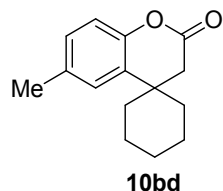

**6-Methylspiro[chromene-4,1'-cyclohexan]-2(3H)-one (10bd):** GP was carried out on the ester **8b** (84 mg, 0.5 mmol), phenol **9d** (162.0 mg, 1.5 mmol), anhydrous FeCl<sub>3</sub> (243 mg, 1.5 mmol) and benzene (1.5 mL). The resulting reaction mixture was stirred at rt for 12 h. [TLC control  $R_f(\mathbf{8b})=0.85$ ,  $R_f(\mathbf{10bd})=0.72$ , (petroleum ether/ethyl acetate 98:2, UV detection)]. Purification of the residue on silica gel column chromatography (petroleum ether/ethyl acetate 100:0 to 98:2 as eluent) furnished the lactone **10bd** (63 mg, 55%) as viscous liquid. IR (MIR-ATR, 4000–600 cm<sup>-1</sup>):  $\nu_{max}=2923, 1765, 1491, 1454, 1256, 1187, 1156, 914, 811$  cm<sup>-1</sup>. <sup>1</sup>H NMR (CDCl<sub>3</sub>, 400 MHz):  $\delta=7.14$  (d, 1H,  $J=1.5$  Hz, ArH), 7.03 (dd, 1H,  $J=8.3$  and 1.5 Hz, ArH), 6.93 (d, 1H,  $J=8.3$  Hz, ArH), 2.76 (s, 2H, CH<sub>2</sub>CO), 2.33 (s, 3H, ArCH<sub>3</sub>), 1.85–1.45 (m, 8H, 4 × CH<sub>2</sub>), 1.35–1.15 (m, 2H, CH<sub>2</sub>) ppm. <sup>13</sup>C NMR (CDCl<sub>3</sub>, 100 MHz):  $\delta=168.6$  (s, O–C=O), 148.9 (s, ArC), 134.2 (s, ArC), 132.2 (s, ArC), 128.4 (d, ArCH), 124.5 (d, ArCH), 116.9 (d, ArCH), 37.3 (t, CH<sub>2</sub>CO), 36.1 (s, C<sub>q</sub>), 35.0 (t, 2C, 2 × CH<sub>2</sub>), 25.6 (t, CH<sub>2</sub>), 21.5 (t, 2C, 2 × CH<sub>2</sub>), 21.0 (q, ArCH<sub>3</sub>) ppm. HR-MS (ESI<sup>+</sup>)  $m/z$  calculated for [C<sub>15</sub>H<sub>18</sub>NaO<sub>2</sub>]<sup>+</sup>=[M+Na]<sup>+</sup>: 253.1199; found 253.1190.

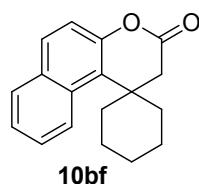

**Spiro[benzo[*f*]chromene-1,1'-cyclohexan]-3(2*H*)-one (10bf):** GP was carried out on the ester **8b** (84 mg, 0.5 mmol), phenol **9f** (216.0 mg, 1.5 mmol), anhydrous FeCl<sub>3</sub> (243 mg, 1.5 mmol) and benzene (1.5 mL). The resulting reaction mixture was stirred at rt for 12 h. [TLC control  $R_f(\mathbf{8b})=0.85$ ,  $R_f(\mathbf{10bf})=0.66$ , (petroleum ether/ethyl acetate 97:3, UV detection)]. Purification of the residue on silica gel column chromatography (petroleum ether/ethyl acetate 100:0 to 98:2 as eluent) furnished the lactone **10bf** (68.3 mg, 51%) as viscous liquid. IR (MIR-ATR, 4000–600 cm<sup>-1</sup>):  $\nu_{max}=2923$ , 1765, 1599, 1511, 1456, 1259, 1200, 1161, 1000, 813, 746 cm<sup>-1</sup>. <sup>1</sup>H NMR (CDCl<sub>3</sub>, 400 MHz):  $\delta=8.42$  (d, 1H,  $J=8.8$  Hz, ArH), 7.83 (dd, 1H,  $J=8.3$  and 1.5 Hz, ArH), 7.73 (d, 1H,  $J=8.8$  Hz, ArH), 7.50 (ddd, 1H,  $J=8.8$ , 8.3 and 1.5 Hz, ArH), 7.42 (dd, 1H,  $J=8.8$  and 8.8 Hz, ArH), 7.18 (d, 1H,  $J=8.8$  Hz, ArH), 2.98 (s, 2H, CH<sub>2</sub>CO), 2.85–2.65 (m, 2H, CH<sub>2</sub>), 1.97–1.32 (m, 8H, 4 × CH<sub>2</sub>) ppm. <sup>13</sup>C NMR (CDCl<sub>3</sub>, 100 MHz):  $\delta=167.9$  (s, O–C=O), 149.3 (s, ArC), 132.1 (s, ArC), 130.9 (s, ArC), 129.8 (d, ArCH), 129.5 (d, ArCH), 125.5 (d, ArCH), 125.1 (s, ArC), 124.3 (d, ArCH), 123.4 (s, ArC), 117.9 (d, ArCH), 39.2 (s, C<sub>q</sub>), 38.9 (t, CH<sub>2</sub>CO), 34.1 (t, 2C, 2 × CH<sub>2</sub>), 25.3 (t, CH<sub>2</sub>), 21.5 (t, 2C, 2 × CH<sub>2</sub>) ppm. HR-MS (ESI<sup>+</sup>)  $m/z$  calculated for [C<sub>18</sub>H<sub>19</sub>O<sub>2</sub>]<sup>+</sup>=[M+H]<sup>+</sup>: 267.1380; found 267.1373.

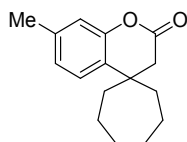

**10cc**

**7-Methylspiro[chromene-4,1'-cycloheptan]-2(3*H*)-one (10cc):** GP was carried out on the ester **8c** (91 mg, 0.5 mmol), phenol **9c** (162.0 mg, 1.5 mmol), anhydrous FeCl<sub>3</sub> (243 mg, 1.5 mmol) and benzene (1.5 mL). The resulting reaction mixture was stirred at rt for 12 h. [TLC control  $R_f(\mathbf{8c})=0.83$ ,  $R_f(\mathbf{10cc})=0.72$ , (petroleum ether/ethyl acetate 98:2, UV detection)]. Purification of the residue on silica gel column chromatography (petroleum ether/ethyl acetate 100:0 to 98:2 as eluent) furnished the lactone **10cc** (89.1 mg, 73%) as viscous liquid. IR (MIR-ATR, 4000–600 cm<sup>-1</sup>):  $\nu_{max}=2920$ , 1766, 1504, 1460, 1415, 1211, 1168, 1134, 968, 814 cm<sup>-1</sup>. <sup>1</sup>H NMR (CDCl<sub>3</sub>, 400 MHz):  $\delta=7.25$  (d, 1H,  $J=7.8$  Hz, ArH), 6.93 (dd, 1H,  $J=7.8$  and 1.0 Hz, ArH), 6.84 (d, 1H,  $J=1.0$  Hz, ArH), 2.63 (s, 2H, CH<sub>2</sub>CO), 2.31 (s, 3H, ArCH<sub>3</sub>), 2.00–1.85 (m, 2H, CH<sub>2</sub>), 1.75–1.45 (m, 10H, 5 × CH<sub>2</sub>) ppm. <sup>13</sup>C NMR (CDCl<sub>3</sub>, 100 MHz):  $\delta=168.6$  (s, O–C=O), 150.3 (s, ArC), 138.0 (s, ArC), 130.4 (s, ArC), 125.3 (d, ArCH), 124.4 (d, ArCH), 117.6 (d, ArCH), 41.5 (t, CH<sub>2</sub>CO), 38.8 (s, C<sub>q</sub>), 38.5 (t, 2C, 2 × CH<sub>2</sub>), 30.3 (t, 2C, 2 × CH<sub>2</sub>), 23.2 (t, 2C, 2 × CH<sub>2</sub>), 20.8 (q, ArCH<sub>3</sub>) ppm. HR-MS (ESI<sup>+</sup>)  $m/z$  calculated for [C<sub>16</sub>H<sub>21</sub>O<sub>2</sub>]<sup>+</sup>=[M+H]<sup>+</sup>: 245.1536; found 245.1525.

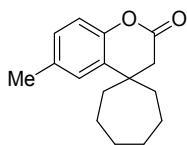

**10cd**

**6-Methylspiro[chromene-4,1'-cycloheptan]-2(3*H*)-one (10cd):** GP was carried out on the ester **8c** (91 mg, 0.5 mmol), phenol **9d** (162.0 mg, 1.5 mmol), anhydrous FeCl<sub>3</sub> (243 mg, 1.5 mmol)

and benzene (1.5 mL). The resulting reaction mixture was stirred at rt for 12 h. [TLC control  $R_f(\mathbf{8c})=0.83$ ,  $R_f(\mathbf{10ac})=0.72$ , (petroleum ether/ethyl acetate 98:2, UV detection)]. Purification of the residue on silica gel column chromatography (petroleum ether/ethyl acetate 100:0 to 98:2 as eluent) furnished the lactone **10cd** (82.9 mg, 68%) as viscous liquid. IR (MIR-ATR, 4000–600  $\text{cm}^{-1}$ ):  $\nu_{\text{max}}=2919$ , 1765, 1490, 1461, 1203, 1167, 818  $\text{cm}^{-1}$ .  $^1\text{H}$  NMR ( $\text{CDCl}_3$ , 400 MHz):  $\delta=7.15$  (d, 1H,  $J=1.5$  Hz, ArH), 7.01 (dd, 1H,  $J=7.8$  and 1.5 Hz, ArH), 6.91 (d, 1H,  $J=7.8$  Hz, ArH), 2.63 (s, 2H,  $\text{CH}_2\text{CO}$ ), 2.33 (s, 3H,  $\text{ArCH}_3$ ), 2.02–1.85 (m, 2H,  $\text{CH}_2$ ), 1.80–1.50 (m, 10H,  $5 \times \text{CH}_2$ ) ppm.  $^{13}\text{C}$  NMR ( $\text{CDCl}_3$ , 100 MHz):  $\delta=168.7$  (s,  $\text{O}-\text{C}=\text{O}$ ), 148.4 (s, ArC), 134.1 (s, ArC), 133.2 (s, ArC), 128.3 (d, ArCH), 125.1 (d, ArCH), 116.9 (d, ArCH), 41.4 (t,  $\text{CH}_2\text{CO}$ ), 39.1 (s,  $\text{C}_q$ ), 38.5 (t, 2C,  $2 \times \text{CH}_2$ ), 30.4 (t, 2C,  $2 \times \text{CH}_2$ ), 23.3 (t, 2C,  $2 \times \text{CH}_2$ ), 21.0 (q,  $\text{ArCH}_3$ ) ppm. HR-MS (ESI $^+$ )  $m/z$  calculated for  $[\text{C}_{16}\text{H}_{21}\text{O}_2]^+=[\text{M}+\text{H}]^+$ : 245.1536; found 245.1524.

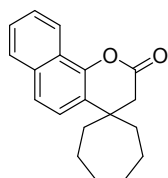

**10ce**

**Spiro[benzo[h]chromene-4,1'-cycloheptan]-2(3H)-one (10ce):** GP was carried out on the ester **8c** (91 mg, 0.5 mmol), phenol **9e** (216.0 mg, 1.5 mmol), anhydrous  $\text{FeCl}_3$  (243 mg, 1.5 mmol) and benzene (1.5 mL). The resulting reaction mixture was stirred at rt for 12 h. [TLC control  $R_f(\mathbf{8c})=0.83$ ,  $R_f(\mathbf{10aa})=0.68$ , (petroleum ether/ethyl acetate 98:2, UV detection)]. Purification of the residue on silica gel column chromatography (petroleum ether/ethyl acetate 100:0 to 98:2 as eluent) furnished the lactone **10ce** (105 mg, 75%) as viscous liquid. IR (MIR-ATR, 4000–600  $\text{cm}^{-1}$ ):  $\nu_{\text{max}}=2922$ , 1770, 1506, 1457, 1257, 1220, 1167, 1095, 815  $\text{cm}^{-1}$ .  $^1\text{H}$  NMR ( $\text{CDCl}_3$ , 400 MHz):  $\delta=8.25$  (d, 1H,  $J=7.8$  Hz, ArH), 7.80 (d, 1H,  $J=8.8$  Hz, ArH), 7.64 (d, 1H,  $J=8.3$  Hz, ArH), 7.57–7.47 (m, 3H, ArH), 2.78 (s, 2H,  $\text{CH}_2\text{CO}$ ), 2.12–1.97 (m, 2H,  $\text{CH}_2$ ), 1.84–1.52 (m, 10H,  $5 \times \text{CH}_2$ ) ppm.  $^{13}\text{C}$  NMR ( $\text{CDCl}_3$ , 100 MHz):  $\delta=168.5$  (s,  $\text{O}-\text{C}=\text{O}$ ), 145.1 (s, ArC), 133.1 (s, ArC), 128.2 (s, ArC), 127.3 (d, ArCH), 126.5 (d, ArCH), 126.4 (d, ArCH), 124.3 (d, ArCH), 123.7 (s, ArC), 122.0 (d, ArCH), 121.5 (d, ArCH), 41.3 (t,  $\text{CH}_2\text{CO}$ ), 39.3 (s,  $\text{C}_q$ ), 38.7 (t, 2C,  $2 \times \text{CH}_2$ ), 30.5 (t, 2C,  $2 \times \text{CH}_2$ ), 23.6 (t, 2C,  $2 \times \text{CH}_2$ ) ppm. HR-MS (ESI $^+$ )  $m/z$  calculated for  $[\text{C}_{19}\text{H}_{20}\text{NaO}_2]^+=[\text{M}+\text{Na}]^+$ : 303.1356; found 303.1351.

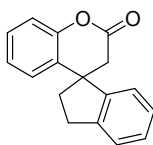

**12aa**

**2',3'-Dihydrospiro[chromene-4,1'-indene]-2(3H)-one (12aa):** GP was carried out on the ester **11a** (101 mg, 0.5 mmol), phenol **9a** (141.0 mg, 1.5 mmol), anhydrous  $\text{FeCl}_3$  (243 mg, 1.5 mmol) and benzene (1.5 mL). The resulting reaction mixture was stirred at rt for 12 h. [TLC control  $R_f(\mathbf{11a})=0.80$ ,  $R_f(\mathbf{12aa})=0.55$ , (petroleum ether/ethyl acetate 95:5, UV detection)]. Purification of the residue on silica gel column chromatography (petroleum ether/ethyl acetate 100:0 to 97:3 as eluent) furnished the lactone **12aa** (77.5 mg, 62%) as viscous liquid. IR (MIR-ATR, 4000–600  $\text{cm}^{-1}$ ):  $\nu_{\text{max}}=2923$ , 1767, 1505, 1457, 1253, 1153, 1016, 815  $\text{cm}^{-1}$ .  $^1\text{H}$  NMR ( $\text{CDCl}_3$ , 400



MHz):  $\delta$ =7.45–7.22 (m, 4H, ArH), 7.13 (dd, 1H,  $J$ =8.3 and 1.0 Hz, ArH), 7.10 (d, 1H,  $J$ =7.3 Hz, ArH), 7.03 (ddd, 1H,  $J$ =8.8, 8.8 and 1.0 Hz, ArH), 6.74 (dd, 1H,  $J$ =7.8 and 1.5 Hz, ArH), 3.10–2.95 (m, 3H, CH<sub>2</sub> and CH<sub>2a</sub>CO), 2.69 (d, 1H,  $J$ =15.6 Hz, CH<sub>2b</sub>CO), 2.40–2.15 (m, 2H, CH<sub>2</sub>) ppm. <sup>13</sup>C NMR (CDCl<sub>3</sub>, 100 MHz):  $\delta$ =167.7 (s, O–C=O), 151.1 (s, ArC), 144.7 (s, ArC), 144.0 (s, ArC), 130.2 (s, ArC), 128.5 (d, ArCH), 128.1 (d, ArCH), 127.3 (d, ArCH), 126.2 (d, ArCH), 125.0 (d, ArCH), 124.6 (d, ArCH), 123.6 (d, ArCH), 117.1 (d, ArCH), 49.6 (s, C<sub>q</sub>), 41.0 (t, CH<sub>2</sub>CO), 39.7 (t, CH<sub>2</sub>), 29.9 (t, CH<sub>2</sub>) ppm. HR-MS (ESI<sup>+</sup>)  $m/z$  calculated for [C<sub>17</sub>H<sub>14</sub>NaO<sub>2</sub>]<sup>+</sup>=[M+Na]<sup>+</sup>: 273.0886; found 273.0882.

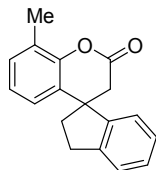

**12ab**

**8-Methyl-2',3'-dihydrospiro[chromene-4,1'-indene]-2(3H)-one (12ab):** GP was carried out on the ester **11a** (101 mg, 0.5 mmol), phenol **9b** (162.0 mg, 1.5 mmol), anhydrous FeCl<sub>3</sub> (243 mg, 1.5 mmol) and benzene (1.5 mL). The resulting reaction mixture was stirred at rt for 12 h. [TLC control  $R_f$ (**11a**)=0.80,  $R_f$ (**12aa**)=0.65, (petroleum ether/ethyl acetate 95:5, UV detection)]. Purification of the residue on silica gel column chromatography (petroleum ether/ethyl acetate 100:0 to 97:3 as eluent) furnished the lactone **12ab** (88.4 mg, 67%) as viscous liquid. IR (MIR-ATR, 4000–600 cm<sup>-1</sup>):  $\nu_{max}$ =2948, 1768, 1591, 1461, 1265, 1243, 1189, 1146, 921, 762 cm<sup>-1</sup>. <sup>1</sup>H NMR (CDCl<sub>3</sub>, 400 MHz):  $\delta$ =7.26 (d, 1H,  $J$ =7.3 Hz, ArH), 7.25–7.12 (m, 2H, ArH), 7.02 (dd, 2H,  $J$ =8.3 and 7.3 Hz, ArH), 6.83 (dd, 1H,  $J$ =7.8 and 7.3 Hz, ArH), 6.47 (d, 1H,  $J$ =7.8 Hz, ArH), 3.00–2.85 (m, 3H, CH<sub>2</sub> and CH<sub>2a</sub>CO), 2.76 (d, 1H,  $J$ =15.6 Hz, CH<sub>2b</sub>CO), 2.29 (s, 3H, ArCH<sub>3</sub>), 2.26–2.05 (m, 2H, CH<sub>2</sub>) ppm. <sup>13</sup>C NMR (CDCl<sub>3</sub>, 100 MHz):  $\delta$ =167.8 (s, O–C=O), 149.3 (s, ArC), 144.9 (s, ArC), 144.0 (s, ArC), 130.1 (d, ArCH), 130.0 (s, ArC), 128.0 (d, ArCH), 127.2 (d, ArCH), 126.4 (s, ArC), 125.0 (d, ArCH), 124.0 (d, ArCH), 123.7 (d, ArCH), 123.6 (d, ArCH), 49.7 (s, C<sub>q</sub>), 40.9 (t, CH<sub>2</sub>CO), 39.6 (t, CH<sub>2</sub>), 29.9 (t, CH<sub>2</sub>), 15.9 (q, ArCH<sub>3</sub>) ppm. HR-MS (ESI<sup>+</sup>)  $m/z$  calculated for [C<sub>18</sub>H<sub>16</sub>NaO<sub>2</sub>]<sup>+</sup>=[M+Na]<sup>+</sup>: 287.1042; found 287.1043.

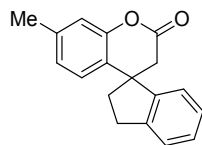

**12ac**

**7-Methyl-2',3'-dihydrospiro[chromene-4,1'-indene]-2(3H)-one (12ac):** GP was carried out on the ester **11a** (101 mg, 0.5 mmol), phenol **9c** (162.0 mg, 1.5 mmol), anhydrous FeCl<sub>3</sub> (243 mg, 1.5 mmol) and benzene (1.5 mL). The resulting reaction mixture was stirred at rt for 12 h. [TLC control  $R_f$ (**11a**)=0.80,  $R_f$ (**12ac**)=0.66, (petroleum ether/ethyl acetate 95:5, UV detection)]. Purification of the residue on silica gel column chromatography (petroleum ether/ethyl acetate 100:0 to 97:3 as eluent) furnished the lactone **12ac** (92.4 mg, 70%) as viscous liquid. IR (MIR-ATR, 4000–600 cm<sup>-1</sup>):  $\nu_{max}$ =2945, 1766, 1577, 1454, 1253, 1210, 1163, 1115, 816, 760 cm<sup>-1</sup>. <sup>1</sup>H NMR (CDCl<sub>3</sub>, 400 MHz):  $\delta$ =7.37–7.20 (m, 3H, ArH), 7.08 (d, 1H,  $J$ =7.3 Hz, ArH), 6.94 (s, 1H, ArH), 6.83 (dd, 1H,  $J$ =7.8 and 1.0 Hz, ArH), 6.63 (d, 1H,  $J$ =7.8 Hz, ArH), 3.07–2.92 (m, 3H,

CH<sub>2</sub> and CH<sub>2a</sub>CO), 2.84 (d, 1H, *J*=15.6 Hz, CH<sub>2b</sub>CO), 2.33 (s, 3H, ArCH<sub>3</sub>), 2.32–2.12 (m, 2H, CH<sub>2</sub>) ppm. <sup>13</sup>C NMR (CDCl<sub>3</sub>, 100 MHz): δ=167.9 (s, O–C=O), 150.9 (s, ArC), 144.9 (s, ArC), 144.0 (s, ArC), 138.8 (s, ArC), 128.0 (d, ArCH), 127.2 (d, ArCH), 127.1 (s, ArC), 125.9 (d, ArCH), 125.3 (d, ArCH), 125.0 (d, ArCH), 123.5 (d, ArCH), 117.5 (d, ArCH), 49.3 (s, C<sub>q</sub>), 41.1 (t, CH<sub>2</sub>CO), 39.7 (t, CH<sub>2</sub>), 29.9 (t, CH<sub>2</sub>), 21.0 (q, ArCH<sub>3</sub>) ppm. HR-MS (ESI<sup>+</sup>) *m/z* calculated for [C<sub>18</sub>H<sub>16</sub>NaO<sub>2</sub>]<sup>+</sup>=[M+Na]<sup>+</sup>: 287.1042; found 287.1043.

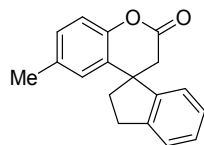

**12ad**

**6-Methyl-2',3'-dihydrospiro[chromene-4,1'-indene]-2(3H)-one (12ad):** GP was carried out on the ester **11a** (101 mg, 0.5 mmol), phenol **9d** (162.0 mg, 1.5 mmol), anhydrous FeCl<sub>3</sub> (243 mg, 1.5 mmol) and benzene (1.5 mL). The resulting reaction mixture was stirred at rt for 12 h. [TLC control *R<sub>f</sub>*(**11a**)=0.80, *R<sub>f</sub>*(**12ad**)=0.65, (petroleum ether/ethyl acetate 95:5, UV detection)]. Purification of the residue on silica gel column chromatography (petroleum ether/ethyl acetate 100:0 to 97:3 as eluent) furnished the lactone **12ad** (162.6 mg, 77%) as viscous liquid. IR (MIR-ATR, 4000–600 cm<sup>-1</sup>): *v*<sub>max</sub>=2925, 1765, 1491, 1456, 1265, 1204, 1157, 1041, 922, 821, 761 cm<sup>-1</sup>. <sup>1</sup>H NMR (CDCl<sub>3</sub>, 400 MHz): δ=7.42–7.21 (m, 3H, ArH), 7.15–6.95 (m, 3H, ArH), 6.55 (d, 1H, *J*=1.0 Hz, ArH), 3.15–2.91 (m, 3H, CH<sub>2</sub> and CH<sub>2a</sub>CO), 2.83 (d, 1H, *J*=15.6 Hz, CH<sub>2b</sub>CO), 2.40–2.10 (m, 2H, CH<sub>2</sub>), 2.21 (s, 3H, ArCH<sub>3</sub>) ppm. <sup>13</sup>C NMR (CDCl<sub>3</sub>, 100 MHz): δ=167.8 (s, O–C=O), 149.0 (s, ArC), 144.8 (s, ArC), 143.9 (s, ArC), 134.3 (s, ArC), 129.8 (s, ArC), 129.0 (d, ArCH), 128.0 (d, ArCH), 127.2 (d, ArCH), 126.3 (d, ArCH), 125.0 (d, ArCH), 123.6 (d, ArCH), 116.7 (d, ArCH), 49.6 (s, C<sub>q</sub>), 41.1 (t, CH<sub>2</sub>CO), 39.6 (t, CH<sub>2</sub>), 29.9 (t, CH<sub>2</sub>), 20.8 (q, ArCH<sub>3</sub>) ppm. HR-MS (ESI<sup>+</sup>) *m/z* calculated for [C<sub>18</sub>H<sub>16</sub>NaO<sub>2</sub>]<sup>+</sup>=[M+Na]<sup>+</sup>: 287.1042; found 287.1047.

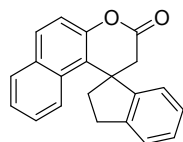

**12af**

**2',3'-Dihydrospiro[benzo[f]chromene-1,1'-indene]-3(2H)-one (12af):** GP was carried out on the ester **11a** (101 mg, 0.5 mmol), phenol **9f** (216.0 mg, 1.5 mmol), anhydrous FeCl<sub>3</sub> (243 mg, 1.5 mmol) and benzene (1.5 mL). The resulting reaction mixture was stirred at rt for 12 h. [TLC control *R<sub>f</sub>*(**11a**)=0.80, *R<sub>f</sub>*(**12af**)=0.66, (petroleum ether/ethyl acetate 98:2, UV detection)]. Purification of the residue on silica gel column chromatography (petroleum ether/ethyl acetate 100:0 to 97:3 as eluent) furnished the lactone **12af** (100.5 mg, 67%) as viscous liquid. IR (MIR-ATR, 4000–600 cm<sup>-1</sup>): *v*<sub>max</sub>=2925, 1761, 1599, 1514, 1460, 1248, 1213, 1169, 1044, 948, 731 cm<sup>-1</sup>. <sup>1</sup>H NMR (CDCl<sub>3</sub>, 400 MHz): δ=7.82 (d, 1H, *J*=8.8 Hz, ArH), 7.81 (d, 1H, *J*=7.8 Hz, ArH), 7.40 (d, 1H, *J*=7.8 Hz, ArH), 7.35–7.26 (m, 3H, ArH), 7.13 (dd, 1H, *J*=7.8 and 7.3 Hz, ArH), 7.10–7.02 (m, 2H, ArH), 6.80 (d, 1H, *J*=7.8 Hz, ArH), 3.30–3.15 (m, 2H, CH<sub>2</sub>), 2.93 (d, 1H, *J*=15.6 Hz, CH<sub>2a</sub>CO), 2.84 (dd, 1H, *J*=15.6 and 1.5 Hz, CH<sub>2b</sub>CO), 2.57–2.35 (m, 2H, CH<sub>2</sub>) ppm. <sup>13</sup>C NMR (CDCl<sub>3</sub>, 100 MHz): δ=166.9 (s, O–C=O), 150.4 (s, ArC), 148.3 (s, ArC), 141.4 (s, ArC), 132.0 (s, ArC), 130.3 (d, 2C, 2 × ArCH), 130.1 (s, ArC), 129.0 (d, ArCH), 127.8 (d,

ArCH), 127.5 (d, ArCH), 125.7 (d, ArCH), 125.5 (d, ArCH), 124.5 (d, ArCH), 123.9 (d, ArCH), 120.9 (s, ArC), 117.7 (d, ArCH), 50.9 (s, C<sub>q</sub>), 42.2 (t, CH<sub>2</sub>CO), 36.8 (t, CH<sub>2</sub>), 29.9 (t, CH<sub>2</sub>) ppm. HR-MS (ESI<sup>+</sup>) m/z calculated for [C<sub>21</sub>H<sub>16</sub>NaO<sub>2</sub>]<sup>+</sup>=[M+Na]<sup>+</sup>: 323.1043; found 323.1042.

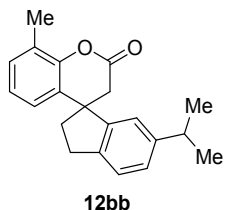

**6'-Isopropyl-8-methyl-2',3'-dihydrospiro[chromene-4,1'-inden]-2(3H)-one (12bb):** GP was carried out on the ester **11b** (122 mg, 0.5 mmol), phenol **9b** (162.0 mg, 1.5 mmol), anhydrous FeCl<sub>3</sub> (243 mg, 1.5 mmol) and benzene (1.5 mL). The resulting reaction mixture was stirred at rt for 12 h. [TLC control *R<sub>f</sub>*(**11b**)=0.85, *R<sub>f</sub>*(**12bb**)=0.67, (petroleum ether/ethyl acetate 97:3, UV detection)]. Purification of the residue on silica gel column chromatography (petroleum ether/ethyl acetate 100:0 to 97:3 as eluent) furnished the lactone **12bb** (128.5 mg, 84%) as viscous liquid. IR (MIR-ATR, 4000–600 cm<sup>-1</sup>):  $\nu_{max}$ =2957, 1768, 1461, 1264, 1188, 1146, 922, 829 cm<sup>-1</sup>. <sup>1</sup>H NMR (CDCl<sub>3</sub>, 400 MHz):  $\delta$ =7.26 (d, 1H, *J*=7.3 Hz, ArH), 7.18 (d, 1H, *J*=7.8 Hz, ArH), 7.11 (d, 1H, *J*=7.3 Hz, ArH), 6.95 (s, 1H, ArH), 6.92 (dd, 1H, *J*=7.8 and 7.3 Hz, ArH), 6.56 (d, 1H, *J*=7.3 Hz, ArH), 3.03 (d, 1H, *J*=15.6 Hz, CH<sub>2a</sub>CO), 2.98–2.84 [m, 3H, CH<sub>2</sub> and CH(CH<sub>3</sub>)<sub>2</sub>], 2.85 (d, 1H, *J*=15.6 Hz, CH<sub>2b</sub>CO), 2.37 (s, 3H, ArCH<sub>3</sub>), 2.34–2.12 (m, 2H, CH<sub>2</sub>), 1.22 [d, 6H, *J*=6.8 Hz, CH(CH<sub>3</sub>)<sub>2</sub>] ppm. <sup>13</sup>C NMR (CDCl<sub>3</sub>, 100 MHz):  $\delta$ =167.9 (s, O–C=O), 149.3 (s, ArC), 148.2 (s, ArC), 144.9 (s, ArC), 141.5 (s, ArC), 130.2 (s, ArC), 130.0 (d, ArCH), 126.4 (s, ArC), 126.2 (d, ArCH), 124.7 (d, ArCH), 124.0 (d, ArCH), 123.7 (d, ArCH), 121.5 (d, ArCH), 49.7 (s, C<sub>q</sub>), 40.9 (t, CH<sub>2</sub>CO), 39.9 (t, CH<sub>2</sub>), 34.0 [d, CH(CH<sub>3</sub>)<sub>2</sub>], 29.4 (t, CH<sub>2</sub>), 24.1 [q, 2C, CH(CH<sub>3</sub>)<sub>2</sub>], 15.9 (q, ArCH<sub>3</sub>) ppm. HR-MS (ESI<sup>+</sup>) m/z calculated for [C<sub>21</sub>H<sub>22</sub>NaO<sub>2</sub>]<sup>+</sup>=[M+Na]<sup>+</sup>: 329.1512; found 329.1512.

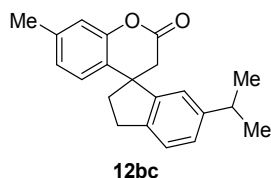

**6'-Isopropyl-7-methyl-2',3'-dihydrospiro[chromene-4,1'-inden]-2(3H)-one (12bc):** GP was carried out on the ester **11b** (162 mg, 0.5 mmol), phenol **9c** (162.0 mg, 1.5 mmol), anhydrous FeCl<sub>3</sub> (243 mg, 1.5 mmol) and benzene (1.5 mL). The resulting reaction mixture was stirred at rt for 12 h. [TLC control *R<sub>f</sub>*(**11b**)=0.85, *R<sub>f</sub>*(**12bc**)=0.66, (petroleum ether/ethyl acetate 97:3, UV detection)]. Purification of the residue on silica gel column chromatography (petroleum ether/ethyl acetate 100:0 to 97:3 as eluent) furnished the lactone **12bc** (125.5 mg, 82%) as viscous liquid. IR (MIR-ATR, 4000–600 cm<sup>-1</sup>):  $\nu_{max}$ =2958, 1766, 1491, 1456, 1253, 1213, 1163, 1036, 817 cm<sup>-1</sup>. <sup>1</sup>H NMR (CDCl<sub>3</sub>, 400 MHz):  $\delta$ =7.26 (d, 1H, *J*=7.8 Hz, ArH), 7.18 (d, 1H, *J*=7.8 Hz, ArH), 6.95 (2 × s, 2H, 2 × ArH), 6.85 (d, 1H, *J*=7.8 Hz, ArH), 6.65 (d, 1H, *J*=7.8 Hz, ArH), 3.00 (d, 1H, *J*=15.6 Hz, CH<sub>2a</sub>CO), 2.99–2.85 [m, 3H, CH<sub>2</sub> and CH(CH<sub>3</sub>)<sub>2</sub>], 2.85 (d, 1H, *J*=15.6 Hz, CH<sub>2b</sub>CO), 2.34 (s, 3H, ArCH<sub>3</sub>), 2.30–2.12 (m, 2H, CH<sub>2</sub>), 1.23 [d, 6H, *J*=6.8 Hz, CH(CH<sub>3</sub>)<sub>2</sub>] ppm. <sup>13</sup>C NMR (CDCl<sub>3</sub>, 100 MHz):  $\delta$ =167.9 (s, O–C=O), 150.9 (s, ArC), 148.2 (s, ArC), 144.9

(s, ArC), 141.3 (s, ArC), 138.6 (s, ArC), 127.2 (s, ArC), 126.2 (d, ArCH), 125.9 (d, ArCH), 125.3 (d, ArCH), 124.7 (d, ArCH), 121.3 (d, ArCH), 117.4 (d, ArCH), 49.2 (s, C<sub>q</sub>), 41.0 (t, CH<sub>2</sub>CO), 40.0 (t, CH<sub>2</sub>), 34.0 [d, CH(CH<sub>3</sub>)<sub>2</sub>], 29.4 (t, CH<sub>2</sub>), 24.1 [q, 2C, CH(CH<sub>3</sub>)<sub>2</sub>], 20.9 (q, ArCH<sub>3</sub>) ppm. HR-MS (ESI<sup>+</sup>) m/z calculated for [C<sub>21</sub>H<sub>22</sub>NaO<sub>2</sub>]<sup>+</sup>=[M+Na]<sup>+</sup>: 329.1512; found 329.1509.

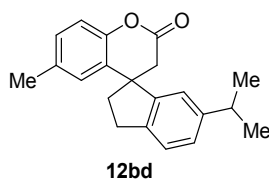

**6'-Isopropyl-6-methyl-2',3'-dihydrospiro[chromene-4,1'-inden]-2(3H)-one (12bd):** GP was carried out on the ester **11b** (122 mg, 0.5 mmol), phenol **9d** (162.0 mg, 1.5 mmol), anhydrous FeCl<sub>3</sub> (243 mg, 1.5 mmol) and benzene (1.5 mL). The resulting reaction mixture was stirred at rt for 12 h. [TLC control  $R_f(\mathbf{11b})=0.83$ ,  $R_f(\mathbf{12bd})=0.66$ , (petroleum ether/ethyl acetate 97:3, UV detection)]. Purification of the residue on silica gel column chromatography (petroleum ether/ethyl acetate 100:0 to 98:2 as eluent) furnished the lactone **12bd** (133.1 mg, 87%) as viscous liquid. IR (MIR-ATR, 4000–600 cm<sup>-1</sup>):  $\nu_{max}=2958, 1768, 1491, 1266, 1206, 1160, 923, 823$  cm<sup>-1</sup>. <sup>1</sup>H NMR (CDCl<sub>3</sub>, 400 MHz):  $\delta=7.26$  (d, 1H,  $J=7.8$  Hz, ArH), 7.18 (dd, 1H,  $J=7.8$  and 1.5 Hz, ArH), 7.05 (d, 1H,  $J=8.3$  Hz, ArH), 7.01 (d, 1H,  $J=8.3$  Hz, ArH), 6.95 (s, 1H, ArH), 6.57 (d, 1H,  $J=1.5$  Hz, ArH), 2.98 (d, 1H,  $J=15.6$  Hz, CH<sub>2a</sub>CO), 2.98–2.75 [m, 3H, CH<sub>2</sub> and CH(CH<sub>3</sub>)<sub>2</sub>], 2.83 (d, 1H,  $J=15.6$  Hz, CH<sub>2b</sub>CO), 2.40–2.10 (m, 2H, CH<sub>2</sub>), 2.21 (s, 3H, ArCH<sub>3</sub>), 1.22 [d, 6H,  $J=6.8$  Hz, CH(CH<sub>3</sub>)<sub>2</sub>] ppm. <sup>13</sup>C NMR (CDCl<sub>3</sub>, 100 MHz):  $\delta=167.9$  (s, O–C=O), 149.0 (s, ArC), 148.2 (s, ArC), 144.9 (s, ArC), 141.4 (s, ArC), 134.2 (s, ArC), 129.9 (s, ArC), 128.9 (d, ArCH), 126.4 (d, ArCH), 126.2 (d, ArCH), 124.7 (d, ArCH), 121.5 (d, ArCH), 116.8 (d, ArCH), 49.6 (s, C<sub>q</sub>), 41.1 (t, CH<sub>2</sub>CO), 39.9 (t, CH<sub>2</sub>), 34.0 [d, CH(CH<sub>3</sub>)<sub>2</sub>], 29.5 (t, CH<sub>2</sub>), 24.2 [q, CH(CH<sub>3</sub>)<sub>2a</sub>], 24.1 [q, CH(CH<sub>3</sub>)<sub>2b</sub>], 20.8 (q, ArCH<sub>3</sub>) ppm. HR-MS (ESI<sup>+</sup>) m/z calculated for [C<sub>21</sub>H<sub>22</sub>NaO<sub>2</sub>]<sup>+</sup>=[M+Na]<sup>+</sup>: 329.1512; found 329.1512.

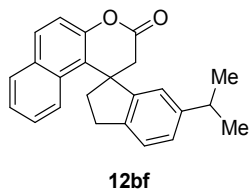

**6'-Isopropyl-2',3'-dihydrospiro[benzo[f]chromene-1,1'-inden]-3(2H)-one (12bf):** GP was carried out on the ester **11b** (122 mg, 0.5 mmol), phenol **9f** (216.0 mg, 1.5 mmol), anhydrous FeCl<sub>3</sub> (243 mg, 1.5 mmol) and benzene (1.5 mL). The resulting reaction mixture was stirred at rt for 12 h. [TLC control  $R_f(\mathbf{11b})=0.80$ ,  $R_f(\mathbf{12bf})=0.61$ , (petroleum ether/ethyl acetate 97:3, UV detection)]. Purification of the residue on silica gel column chromatography (petroleum ether/ethyl acetate 100:0 to 97:3 as eluent) furnished the lactone **12bf** (112.9 mg, 66%) as viscous liquid. IR (MIR-ATR, 4000–600 cm<sup>-1</sup>):  $\nu_{max}=2957, 1773, 1513, 1460, 1248, 1212, 1166, 988, 814, 746$  cm<sup>-1</sup>. <sup>1</sup>H NMR (CDCl<sub>3</sub>, 400 MHz):  $\delta=7.82$  (d, 1H,  $J=8.8$  Hz, ArH), 7.80 (d, 1H,  $J=8.8$  Hz, ArH), 7.35–7.26 (m, 3H, ArH), 7.16 (d, 1H,  $J=1.5$  Hz, ArH), 7.07–7.00 (m, 2H, ArH), 6.63 (d, 1H,  $J=1.5$  Hz, ArH), 3.25–3.05 (m, 2H, CH<sub>2</sub>), 2.94 (d, 1H,  $J=15.6$  Hz, CH<sub>2a</sub>CO), 2.85

(dd, 1H,  $J=15.6$  and  $1.5$  Hz,  $\text{CH}_{2b}\text{CO}$ ), 2.72 [sept, 1H,  $J=6.8$  Hz,  $\text{CH}(\text{CH}_3)_2$ ], 2.52–2.32 (m, 2H,  $\text{CH}_2$ ), 1.04 [d, 6H,  $J=6.8$  Hz,  $\text{CH}(\text{CH}_3)_2$ ] ppm.  $^{13}\text{C}$  NMR ( $\text{CDCl}_3$ , 100 MHz):  $\delta=167.1$  (s,  $\text{O}=\text{C}=\text{O}$ ), 150.3 (s, ArC), 148.6 (s, ArC), 148.2 (s, ArC), 138.8 (s, ArC), 132.0 (s, ArC), 130.2 (d, ArCH), 130.0 (s, ArC), 128.8 (d, ArCH), 125.9 ( $2 \times$  d, 2C,  $2 \times$  ArCH), 125.5 (d, ArCH), 125.1 (d, ArCH), 124.5 (d, ArCH), 122.0 (d, ArCH), 121.2 (s, ArC), 117.6 (d, ArCH), 50.8 (s,  $\text{C}_q$ ), 42.0 (t,  $\text{CH}_2\text{CO}$ ), 37.2 (t,  $\text{CH}_2$ ), 33.9 [d,  $\text{CH}(\text{CH}_3)_2$ ], 29.5 (t,  $\text{CH}_2$ ), 24.1 [q,  $\text{CH}(\text{CH}_3)_{2a}$ ], 23.8 [q,  $\text{CH}(\text{CH}_3)_{2b}$ ] ppm. HR-MS (ESI<sup>+</sup>)  $m/z$  calculated for  $[\text{C}_{24}\text{H}_{22}\text{NaO}_2]^+=[\text{M}+\text{Na}]^+$ : 365.1512; found 365.1508.

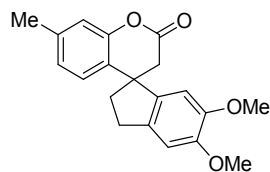

**12cc**

**5',6'-Dimethoxy-7-methyl-2',3'-dihydrospiro[chromene-4,1'-inden]-2(3H)-one (12cc):** GP was carried out on the ester **11c** (131 mg, 0.5 mmol), phenol **9c** (162.0 mg, 1.5 mmol), anhydrous  $\text{FeCl}_3$  (243 mg, 1.5 mmol) and benzene (1.5 mL). The resulting reaction mixture was stirred at rt for 12 h. [TLC control  $R_f(\mathbf{11c})=0.80$ ,  $R_f(\mathbf{12cc})=0.55$ , (petroleum ether/ethyl acetate 90:10, UV detection)]. Purification of the residue on silica gel column chromatography (petroleum ether/ethyl acetate 98:2 to 93:7 as eluent) furnished the lactone **12cc** (116.6 mg, 72%) as viscous liquid. IR (MIR-ATR, 4000–600  $\text{cm}^{-1}$ ):  $\nu_{\text{max}}=2935$ , 1765, 1502, 1454, 1257, 1166, 1037, 823  $\text{cm}^{-1}$ .  $^1\text{H}$  NMR ( $\text{CDCl}_3$ , 400 MHz):  $\delta=6.92$  (s, 1H, ArH), 6.84 (d, 1H,  $J=7.8$  Hz, ArH), 6.83 (s, 1H, ArH), 6.64 (d, 1H,  $J=7.8$  Hz, ArH), 6.55 (s, 1H, ArH), 3.89 (s, 3H,  $\text{OCH}_3$ ), 3.78 (s, 3H,  $\text{OCH}_3$ ), 2.95 (d, 1H,  $J=15.6$  Hz,  $\text{CH}_{2a}\text{CO}$ ), 2.94–2.86 (m, 2H,  $\text{CH}_2$ ), 2.81 (d, 1H,  $J=15.6$  Hz,  $\text{CH}_{2b}\text{CO}$ ), 2.32 (s, 3H,  $\text{ArCH}_3$ ), 2.32–2.10 (m, 2H,  $\text{CH}_2$ ) ppm.  $^{13}\text{C}$  NMR ( $\text{CDCl}_3$ , 100 MHz):  $\delta=167.9$  (s,  $\text{O}=\text{C}=\text{O}$ ), 150.8 (s, ArC), 149.3 (s, ArC), 148.7 (s, ArC), 138.8 (s, ArC), 136.1 (s, ArC), 135.7 (s, ArC), 127.3 (s, ArC), 125.9 (d, ArCH), 125.3 (d, ArCH), 117.5 (d, ArCH), 107.6 (d, ArCH), 106.1 (d, ArCH), 55.9 ( $2 \times$  q, 2C,  $2 \times$   $\text{OCH}_3$ ), 49.5 (s,  $\text{C}_q$ ), 41.2 (t,  $\text{CH}_2\text{CO}$ ), 40.1 (t,  $\text{CH}_2$ ), 29.8 (t,  $\text{CH}_2$ ), 20.9 (q,  $\text{ArCH}_3$ ) ppm. HR-MS (ESI<sup>+</sup>)  $m/z$  calculated for  $[\text{C}_{20}\text{H}_{20}\text{NaO}_4]^+=[\text{M}+\text{Na}]^+$ : 347.1253; found 347.1254.

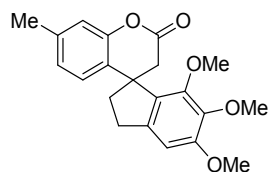

**12dc**

**5',6',7'-Trimethoxy-7-methyl-2',3'-dihydrospiro[chromene-4,1'-inden]-2(3H)-one (12dc):** GP was carried out on the ester **11d** (146 mg, 0.5 mmol), phenol **9c** (162.0 mg, 1.5 mmol), anhydrous  $\text{FeCl}_3$  (243 mg, 1.5 mmol) and benzene (1.5 mL). The resulting reaction mixture was stirred at rt for 12 h. [TLC control  $R_f(\mathbf{11d})=0.81$ ,  $R_f(\mathbf{12dc})=0.58$ , (petroleum ether/ethyl acetate 90:10, UV detection)]. Purification of the residue on silica gel column chromatography (petroleum ether/ethyl acetate 98:2 to 93:7 as eluent) furnished the lactone **12dc** (136.3 mg, 77%) as viscous liquid. IR (MIR-ATR, 4000–600  $\text{cm}^{-1}$ ):  $\nu_{\text{max}}=2937$ , 1767, 1583, 1464, 1413,

1338, 1226, 1165, 1115, 1062, 820  $\text{cm}^{-1}$ .  $^1\text{H}$  NMR ( $\text{CDCl}_3$ , 400 MHz):  $\delta$ =6.90 (s, 1H, ArH), 6.79 (d, 1H,  $J$ =7.8 Hz, ArH), 6.60 (s, 1H, ArH), 6.55 (d, 1H,  $J$ =7.8 Hz, ArH), 3.87 (s, 3H,  $\text{OCH}_3$ ), 3.80 (s, 3H,  $\text{OCH}_3$ ), 3.63 (s, 3H,  $\text{OCH}_3$ ), 3.57 (d, 1H,  $J$ =15.6 Hz,  $\text{CH}_2\text{bCO}$ ), 2.97–2.85 (m, 2H,  $\text{CH}_2$ ), 2.80 (d, 1H,  $J$ =15.6 Hz,  $\text{CH}_2\text{bCO}$ ), 2.31 (s, 3H,  $\text{ArCH}_3$ ), 2.29–2.12 (m, 2H,  $\text{CH}_2$ ) ppm.  $^{13}\text{C}$  NMR ( $\text{CDCl}_3$ , 100 MHz):  $\delta$ =168.5 (s,  $\text{O}-\text{C}=\text{O}$ ), 154.6 (s, ArC), 150.4 (s, ArC), 150.2 (s, ArC), 140.8 (s, ArC), 139.7 (s, ArC), 138.5 (s, ArC), 128.3 (s, ArC), 127.3 (s, ArC), 125.4 (d, ArCH), 125.0 (d, ArCH), 117.5 (d, ArCH), 103.1 (d, ArCH), 60.8 (q,  $\text{OCH}_3$ ), 60.2 (q,  $\text{OCH}_3$ ), 56.1 (q,  $\text{OCH}_3$ ), 49.4 (s,  $\text{C}_q$ ), 41.0 (t,  $\text{CH}_2\text{CO}$ ), 40.7 (t,  $\text{CH}_2$ ), 30.8 (t,  $\text{CH}_2$ ), 21.0 (q,  $\text{ArCH}_3$ ) ppm. HR-MS ( $\text{ESI}^+$ )  $m/z$  calculated for  $[\text{C}_{21}\text{H}_{22}\text{NaO}_5]^+=[\text{M}+\text{Na}]^+$ : 377.1359; found 377.1353.

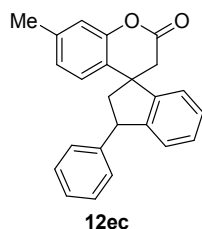

**7-Methyl-3'-phenyl-2',3'-dihydrospiro[chromene-4,1'-inden]-2(3H)-one (12ec):** GP was carried out on the ester **11e** (139 mg, 0.5 mmol), phenol **9ac** (162.0 mg, 1.5 mmol), anhydrous  $\text{FeCl}_3$  (243 mg, 1.5 mmol) and benzene (1.5 mL). The resulting reaction mixture was stirred at rt for 12 h. [TLC control  $R_f(\mathbf{11e})=0.8$ ,  $R_f(\mathbf{12ec})=0.66$ , (petroleum ether/ethyl acetate 95:5, UV detection)]. Purification of the residue on silica gel column chromatography (petroleum ether/ethyl acetate 100:0 to 97:3 as eluent) furnished the lactone **12ec** (76.5 mg, 45%) as white solid. IR (MIR-ATR, 4000–600  $\text{cm}^{-1}$ ):  $\nu_{\text{max}}=2922$ , 1772, 1500, 1453, 1223, 1166, 1025, 820, 756  $\text{cm}^{-1}$ .  $^1\text{H}$  NMR ( $\text{CDCl}_3$ , 400 MHz):  $\delta$ =7.37–7.26 (m, 4H, ArH), 7.25 (t, 1H,  $J$ =7.3 Hz, ArH), 7.20–7.12 (m, 3H, ArH), 7.04 (d, 1H,  $J$ =8.3 Hz, ArH), 6.96 (s, 1H, ArH), 6.80 (d, 1H,  $J$ =7.8 Hz, ArH), 6.36 (d, 1H,  $J$ =7.8 Hz, ArH), 4.37 (dd, 1H,  $J$ =10.3 and 7.3 Hz,  $\text{CHCH}_2$ ), 3.29 (d, 1H,  $J$ =15.6 Hz,  $\text{CH}_2\text{aCO}$ ), 2.92 (d, 1H,  $J$ =15.6 Hz,  $\text{CH}_2\text{bCO}$ ), 2.66 (dd, 1H,  $J$ =12.7 and 7.3 Hz,  $\text{CHCH}_2\text{a}$ ), 2.33 (s, 3H,  $\text{ArCH}_3$ ), 2.27 (dd, 1H,  $J$ =12.7 and 10.3 Hz,  $\text{CHCH}_2\text{b}$ ) ppm.  $^{13}\text{C}$  NMR ( $\text{CDCl}_3$ , 100 MHz):  $\delta$ =168.0 (s,  $\text{O}-\text{C}=\text{O}$ ), 150.5 (s, ArC), 147.4 (s, ArC), 144.5 (s, ArC), 143.1 (s, ArC), 139.0 (s, ArC), 128.7 (d, 2C,  $2 \times \text{ArCH}$ ), 128.5 (d, ArCH), 128.3 (d, 2C,  $2 \times \text{ArCH}$ ), 127.9 (d, ArCH), 127.3 (s, ArC), 126.9 (d, ArCH), 125.6 (d, ArCH), 125.4 (d, ArCH), 125.2 (d, ArCH), 123.1 (d, ArCH), 117.7 (d, ArCH), 50.9 (t,  $\text{CH}_2$ ), 48.6 (t,  $\text{CHCH}_2$ ), 48.1 (s,  $\text{C}_q$ ), 41.6 (t,  $\text{CH}_2$ ), 21.0 (q,  $\text{ArCH}_3$ ) ppm. HR-MS ( $\text{ESI}^+$ )  $m/z$  calculated for  $[\text{C}_{24}\text{H}_{20}\text{NaO}_2]^+=[\text{M}+\text{Na}]^+$ : 363.1356; found 363.1358.

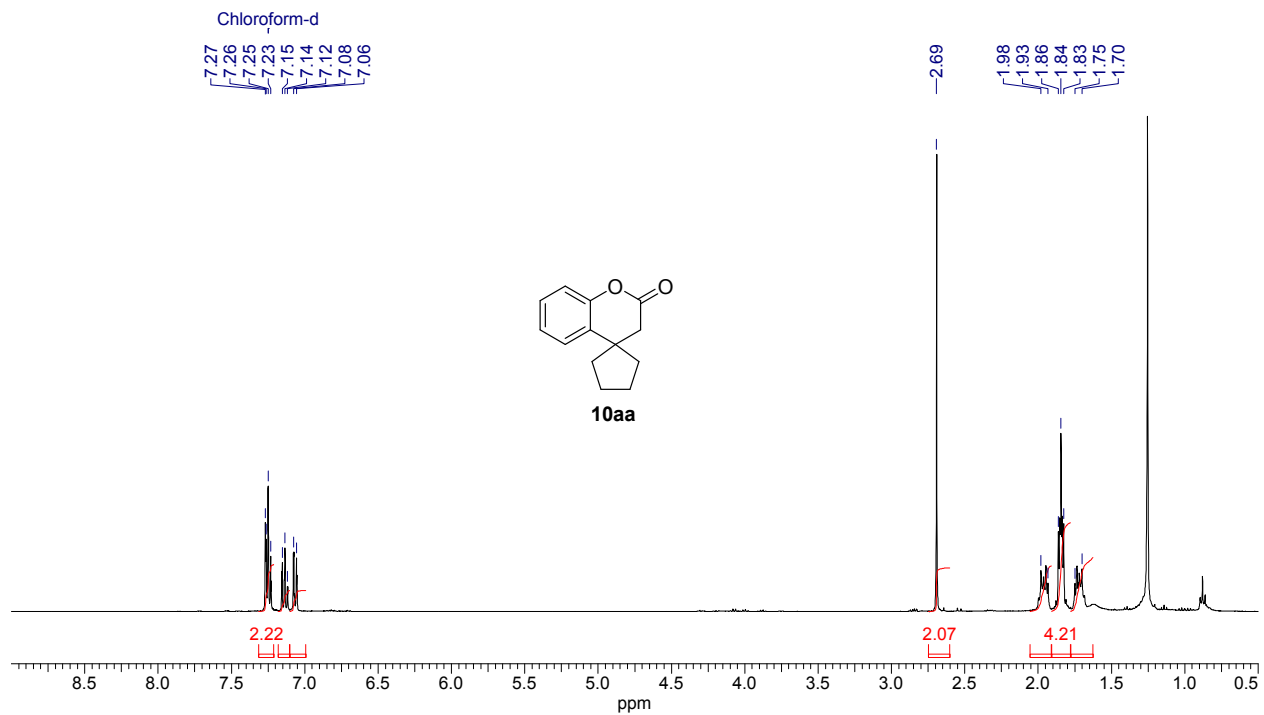

$^1\text{H}$  NMR (400 MHz) spectrum of **10aa** in  $\text{CDCl}_3$

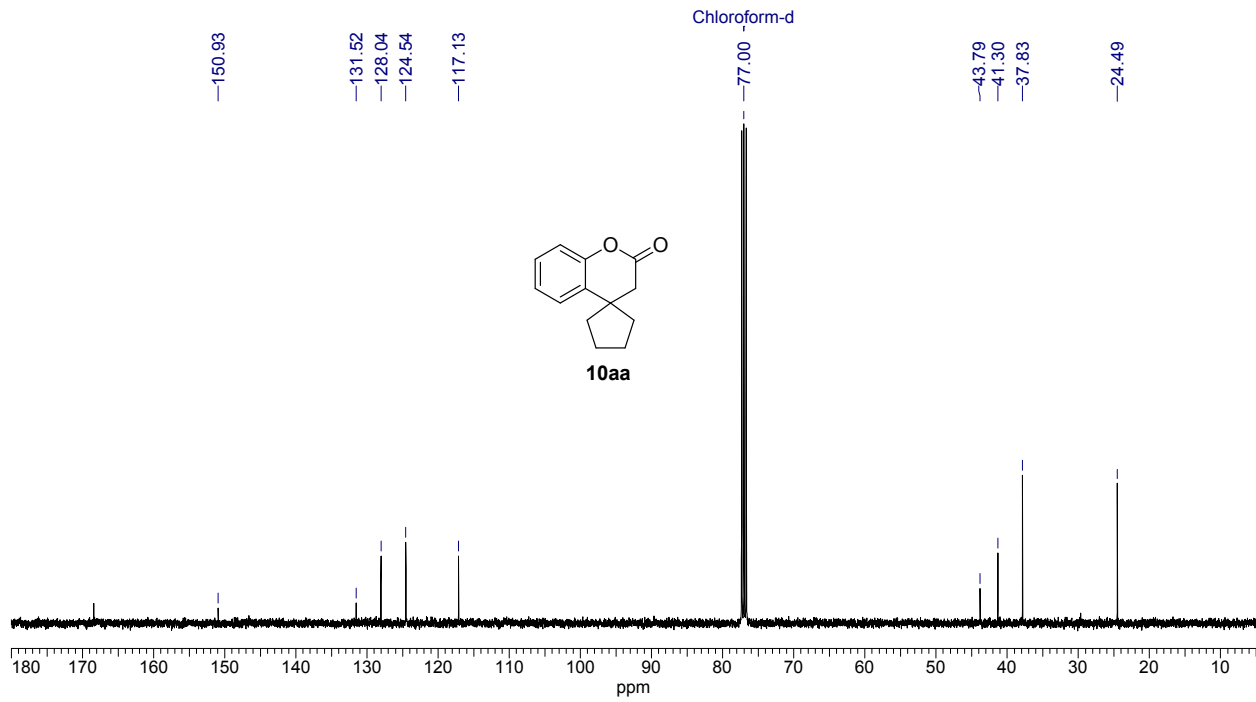

$^{13}\text{C}$  NMR (100 MHz) spectrum of **10aa** in  $\text{CDCl}_3$

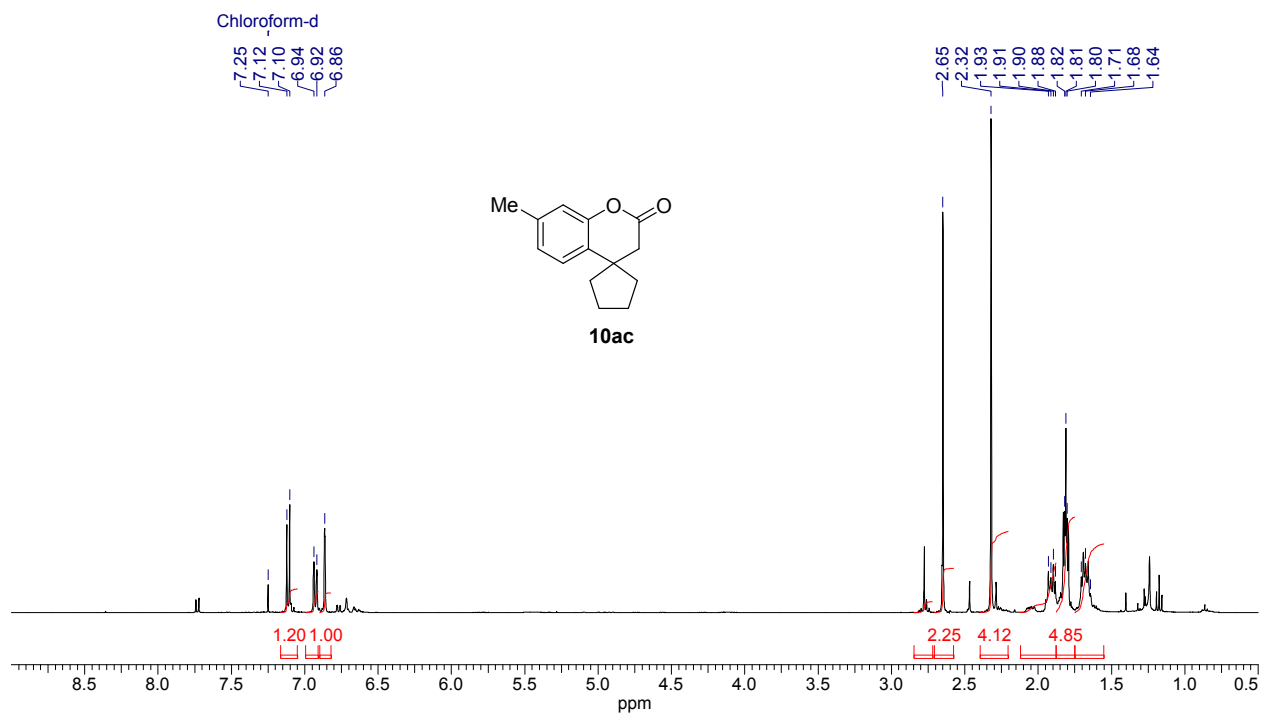

$^1\text{H}$  NMR (400 MHz) spectrum of **10ac** in  $\text{CDCl}_3$



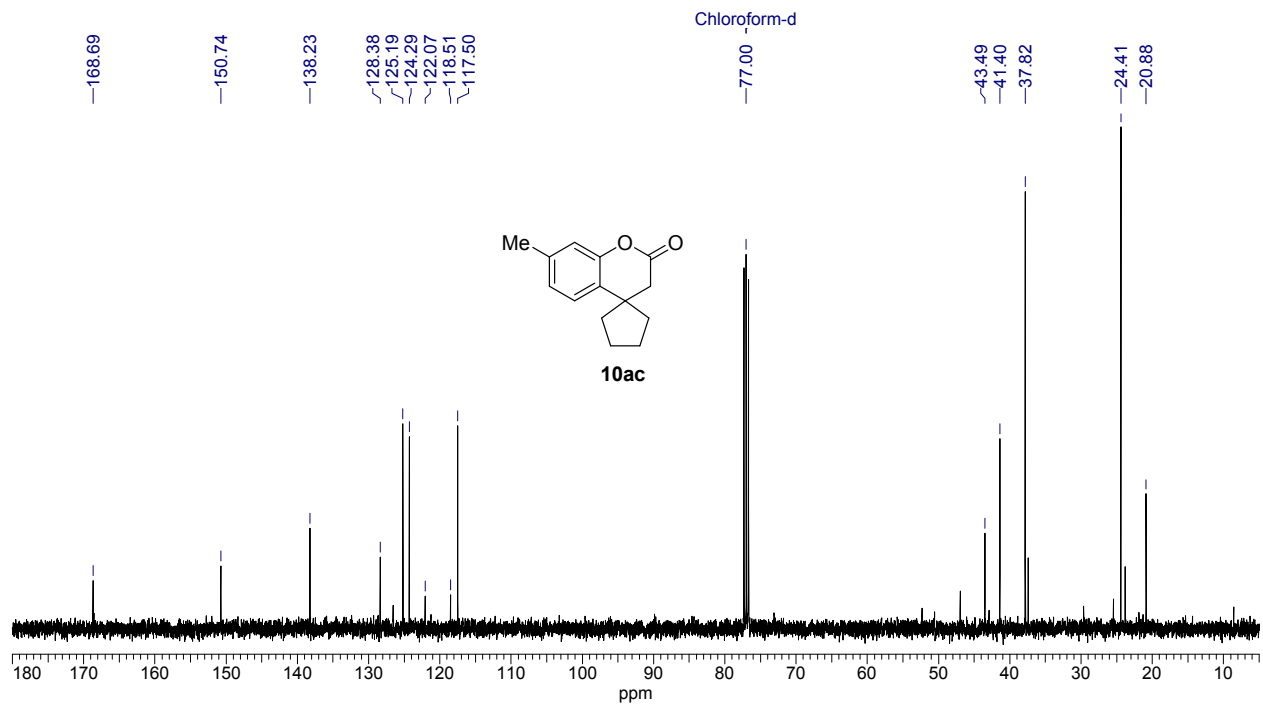

$^{13}\text{C}$  NMR (100 MHz) spectrum of **10ac** in  $\text{CDCl}_3$

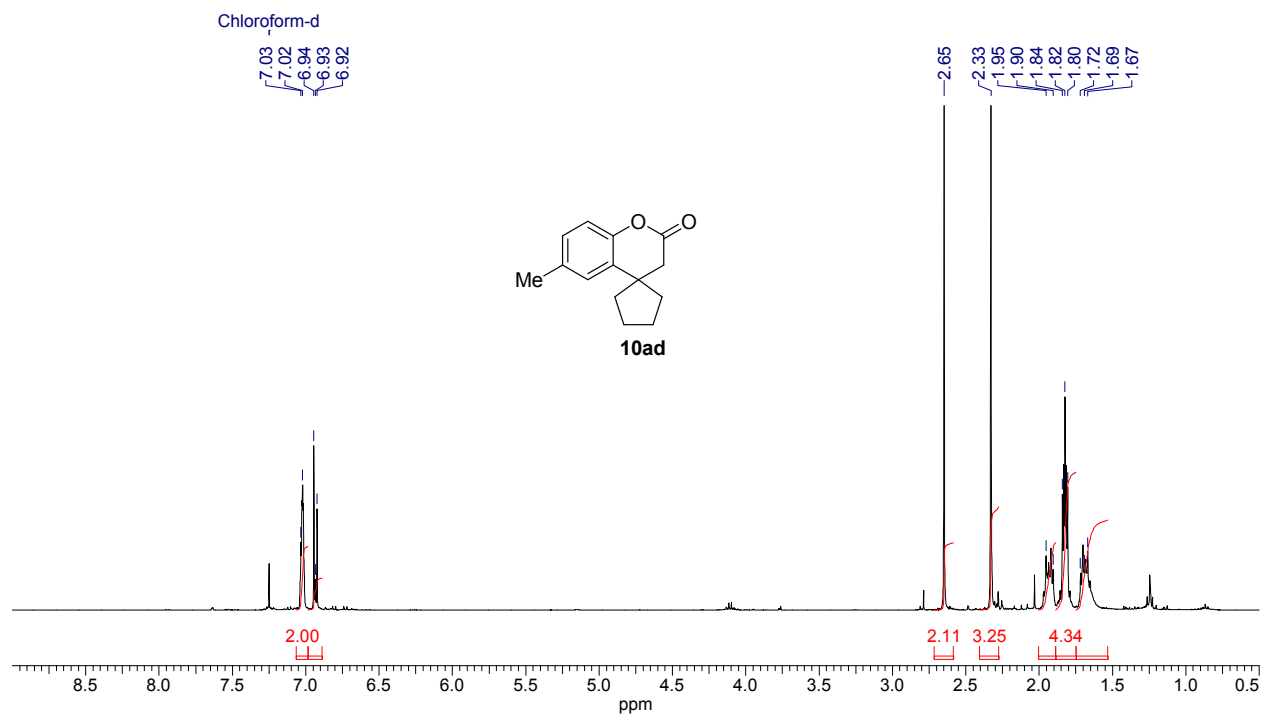

$^1\text{H}$  NMR (400 MHz) spectrum of **10ad** in  $\text{CDCl}_3$

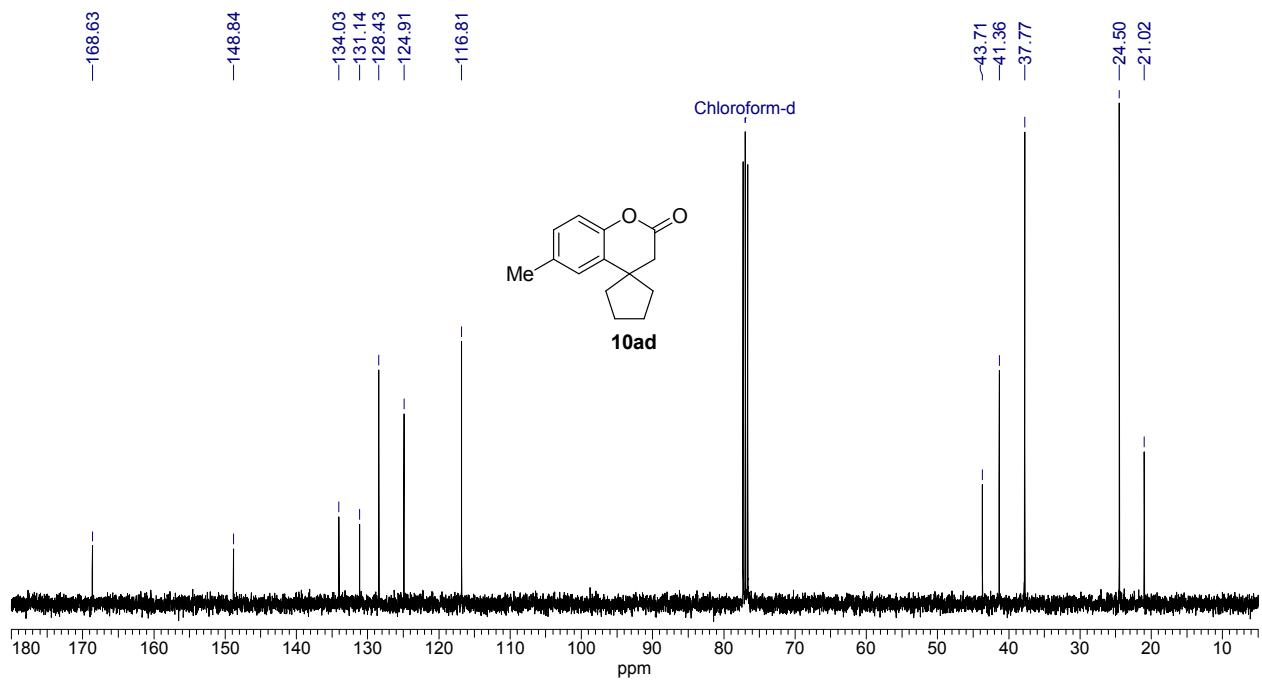

<sup>13</sup>C NMR (100 MHz) spectrum of **10ad** in CDCl<sub>3</sub>

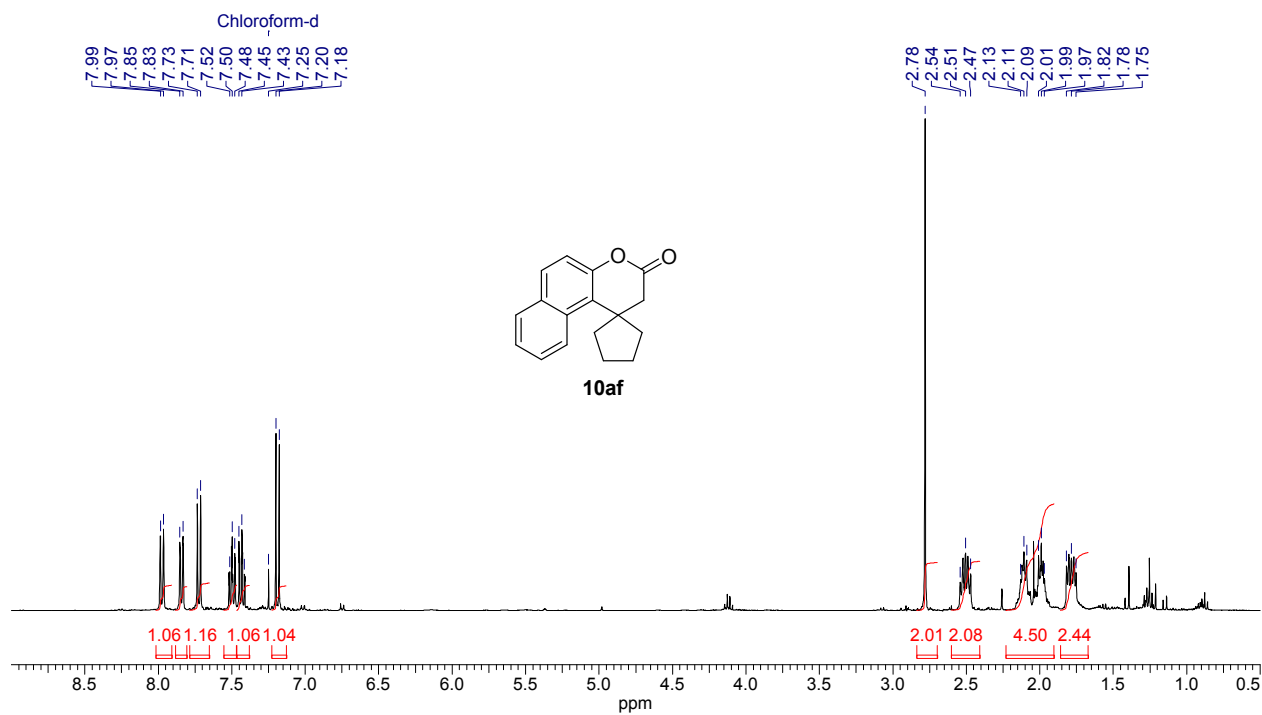

<sup>1</sup>H NMR (400 MHz) spectrum of **10af** in CDCl<sub>3</sub>

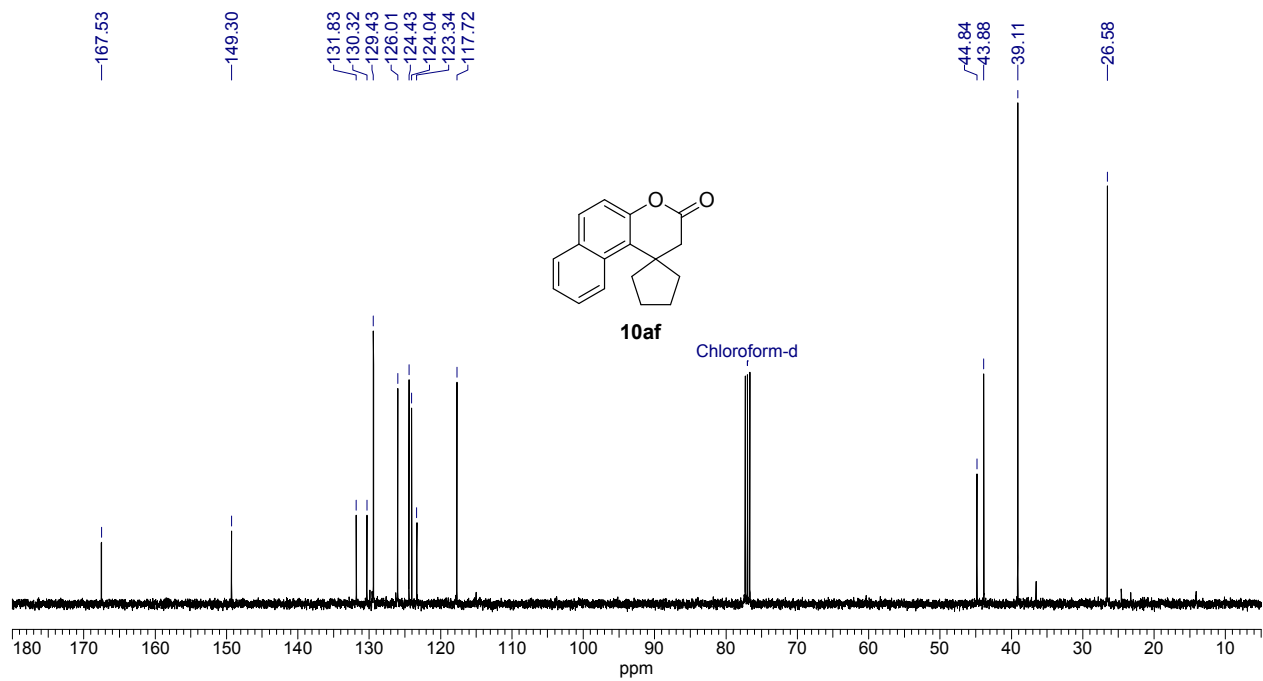

$^{13}\text{C}$  NMR (100 MHz) spectrum of **10af** in  $\text{CDCl}_3$

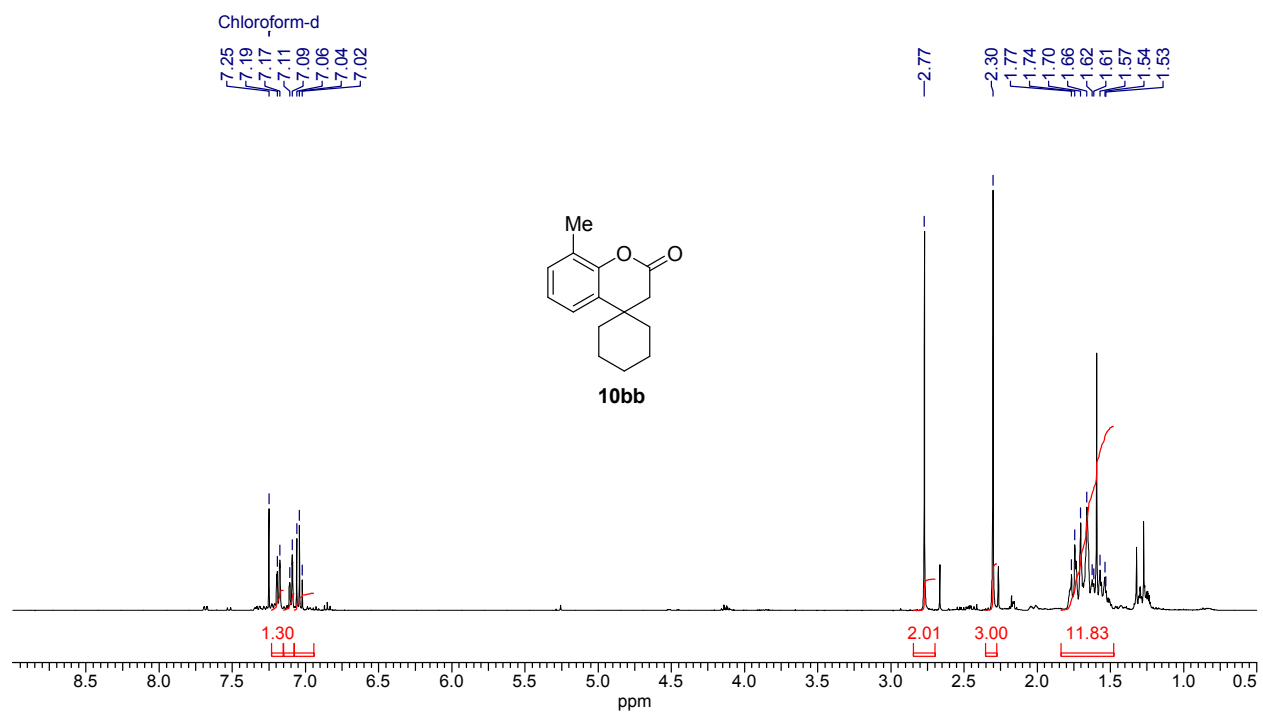

$^1\text{H}$  NMR (400 MHz) spectrum of **10bb** in  $\text{CDCl}_3$

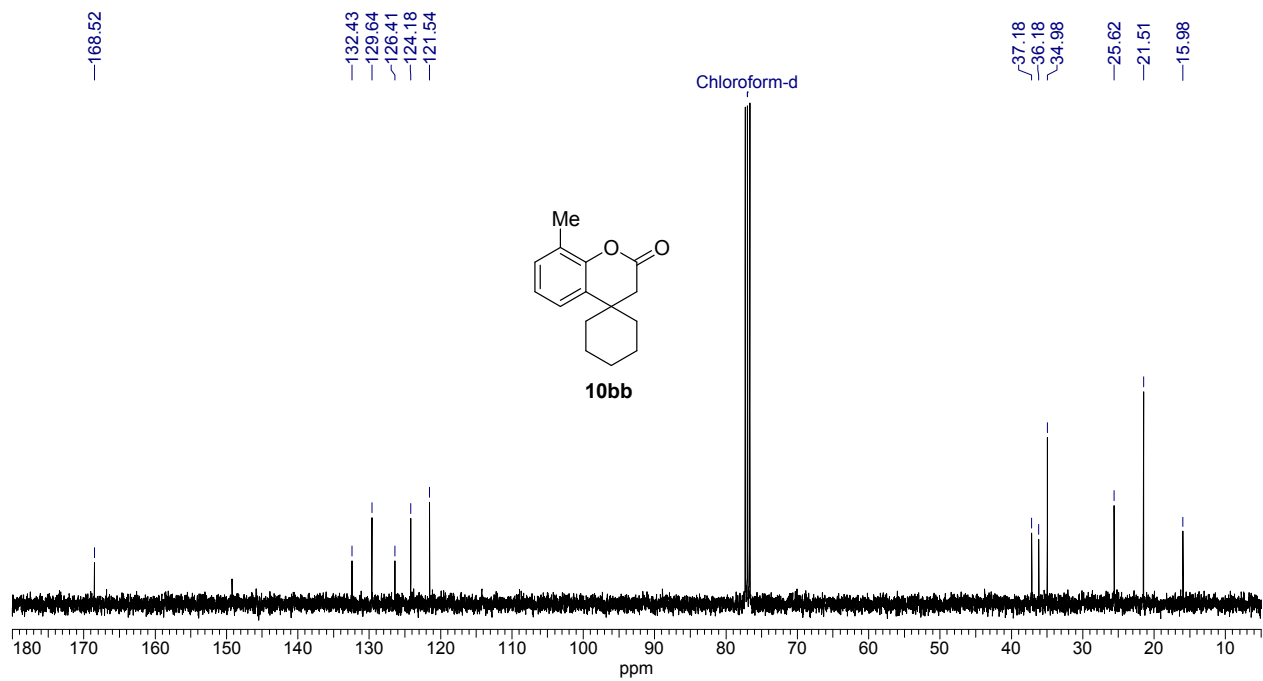

**13C NMR (100 MHz) spectrum of 10bb in CDCl<sub>3</sub>**

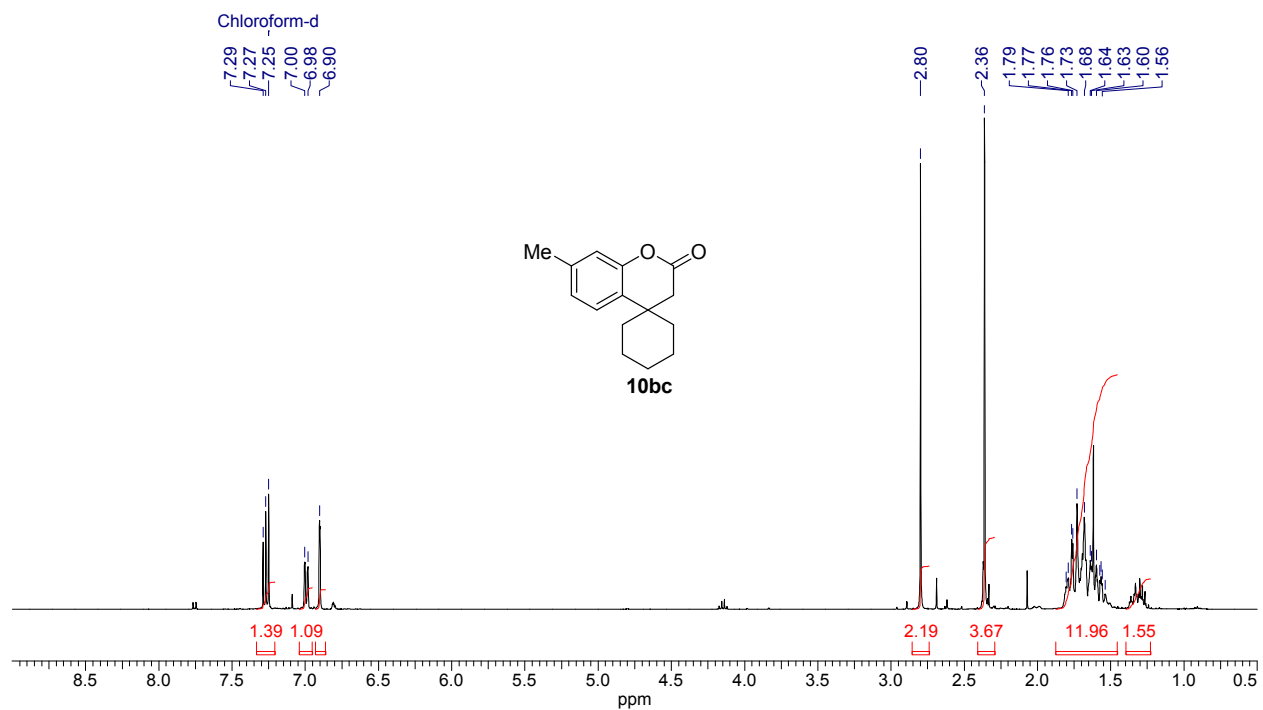

**1H NMR (400 MHz) spectrum of 10bc in CDCl<sub>3</sub>**

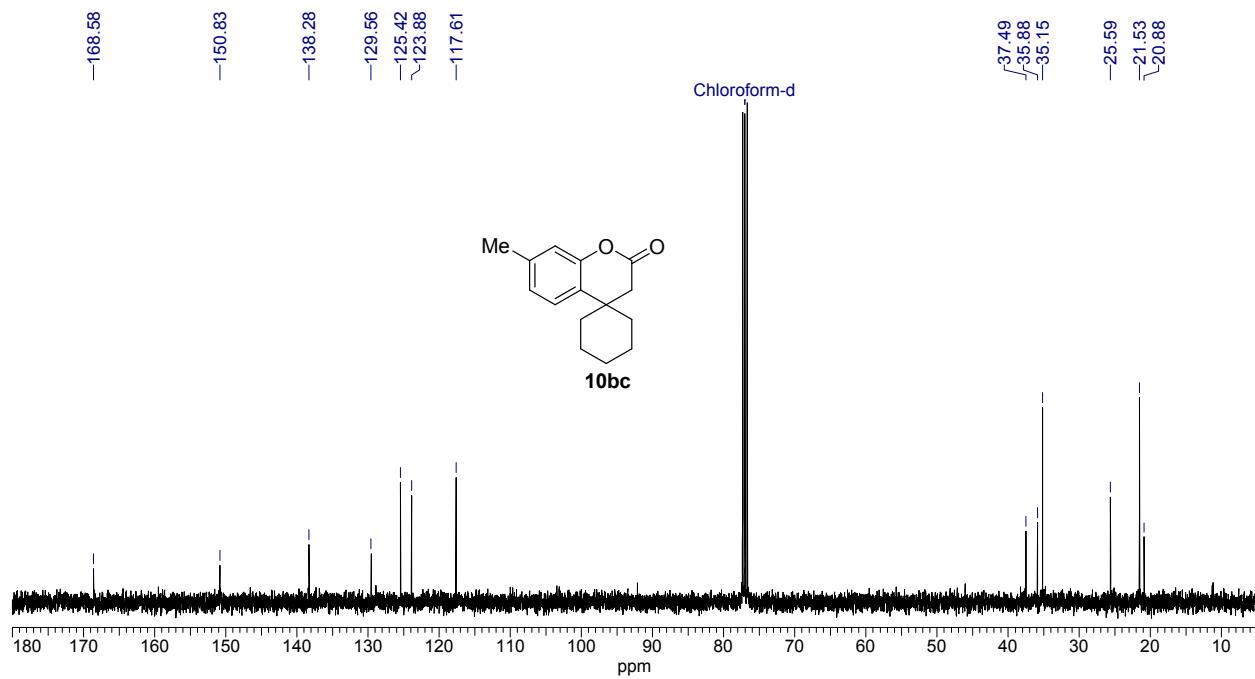

<sup>13</sup>C NMR (100 MHz) spectrum of **10bc** in CDCl<sub>3</sub>

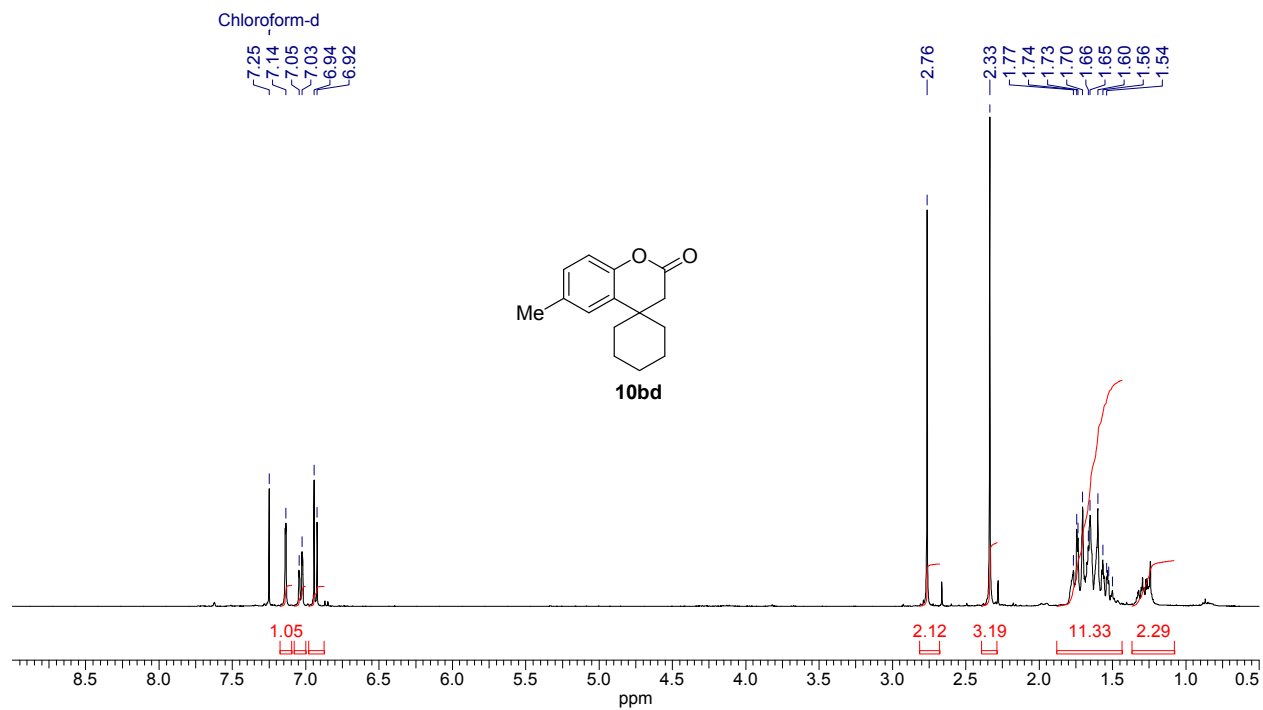

<sup>1</sup>H NMR (400 MHz) spectrum of **10bd** in CDCl<sub>3</sub>

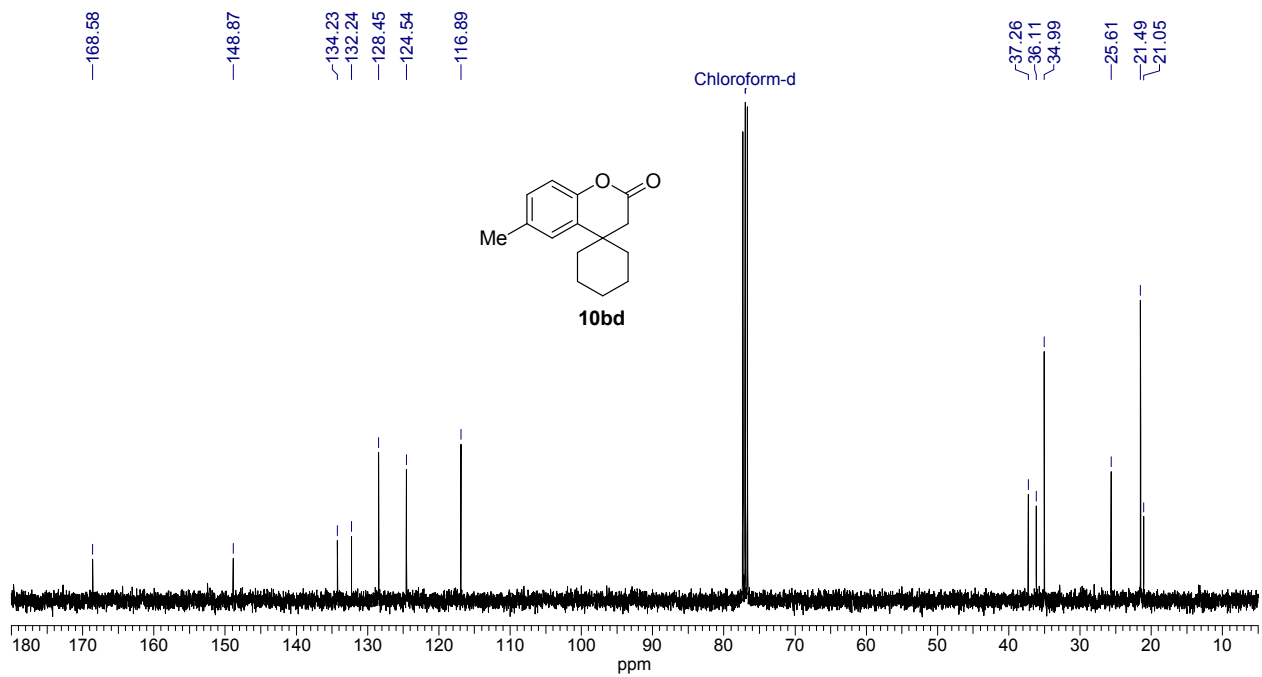

<sup>13</sup>C NMR (100 MHz) spectrum of **10bd** in CDCl<sub>3</sub>

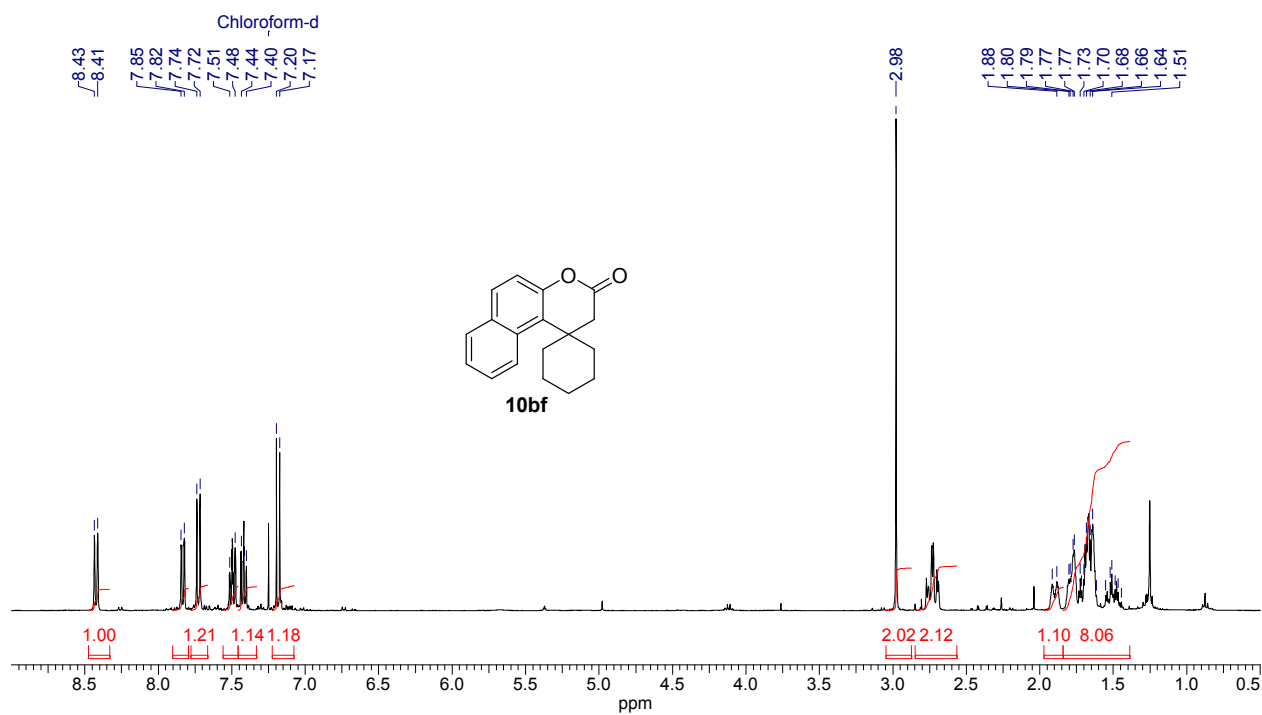

<sup>1</sup>H NMR (400 MHz) spectrum of **10bf** in CDCl<sub>3</sub>

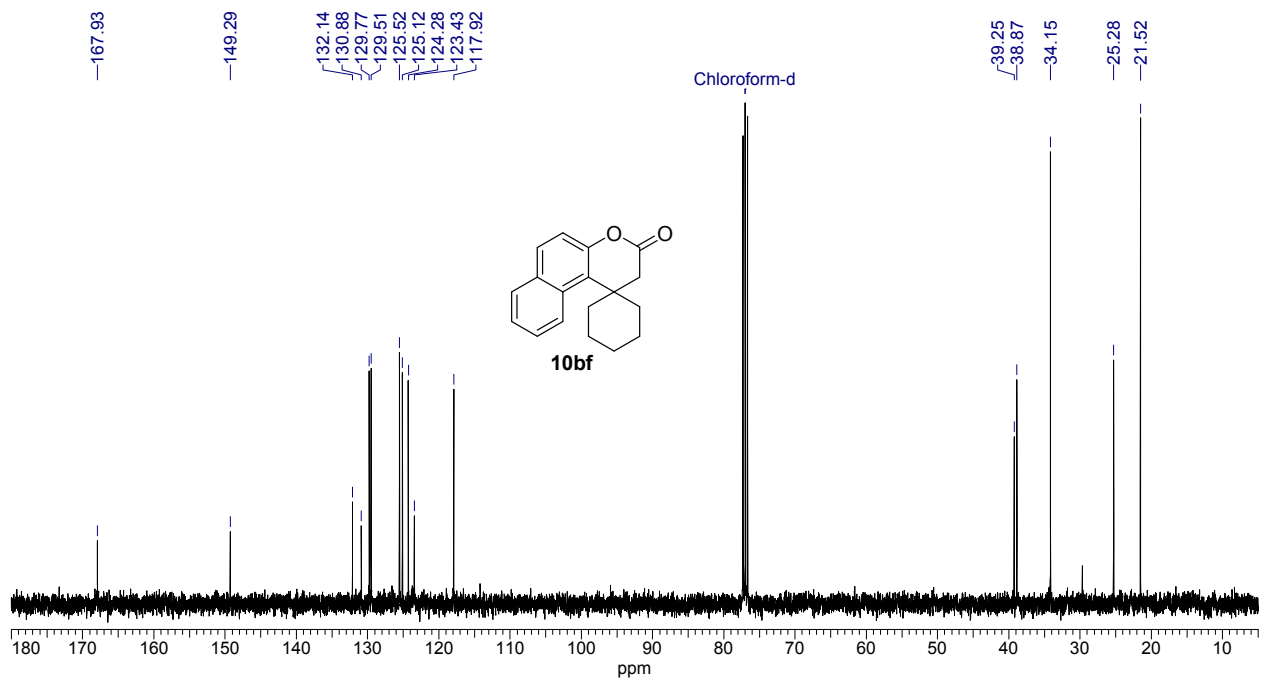

<sup>13</sup>C NMR (100 MHz) spectrum of **10bf** in CDCl<sub>3</sub>

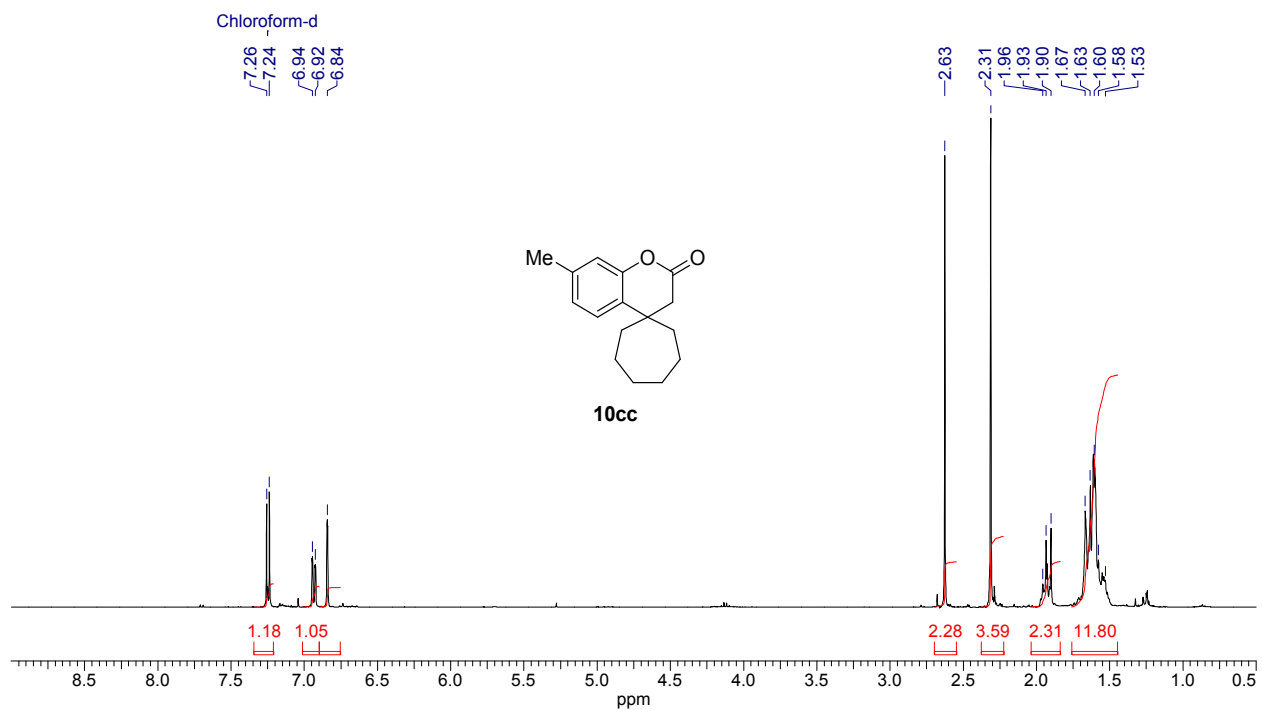

<sup>1</sup>H NMR (400 MHz) spectrum of **10cc** in CDCl<sub>3</sub>

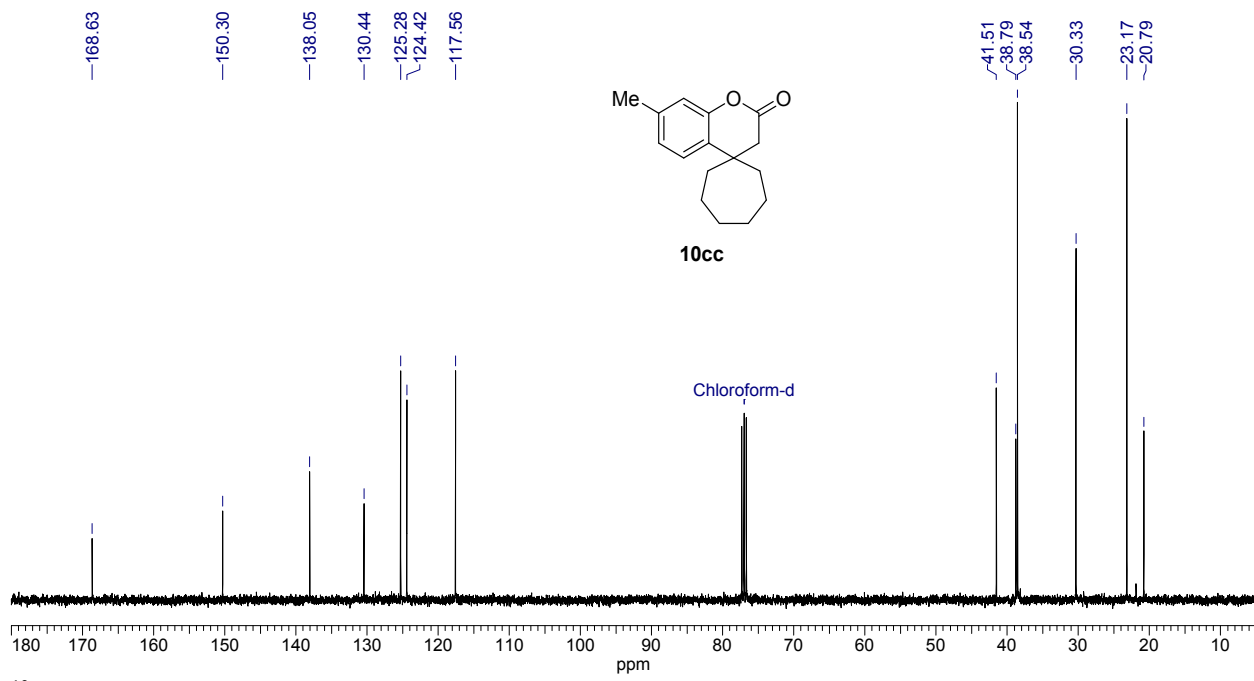

$^{13}\text{C}$  NMR (100 MHz) spectrum of **10cc** in  $\text{CDCl}_3$

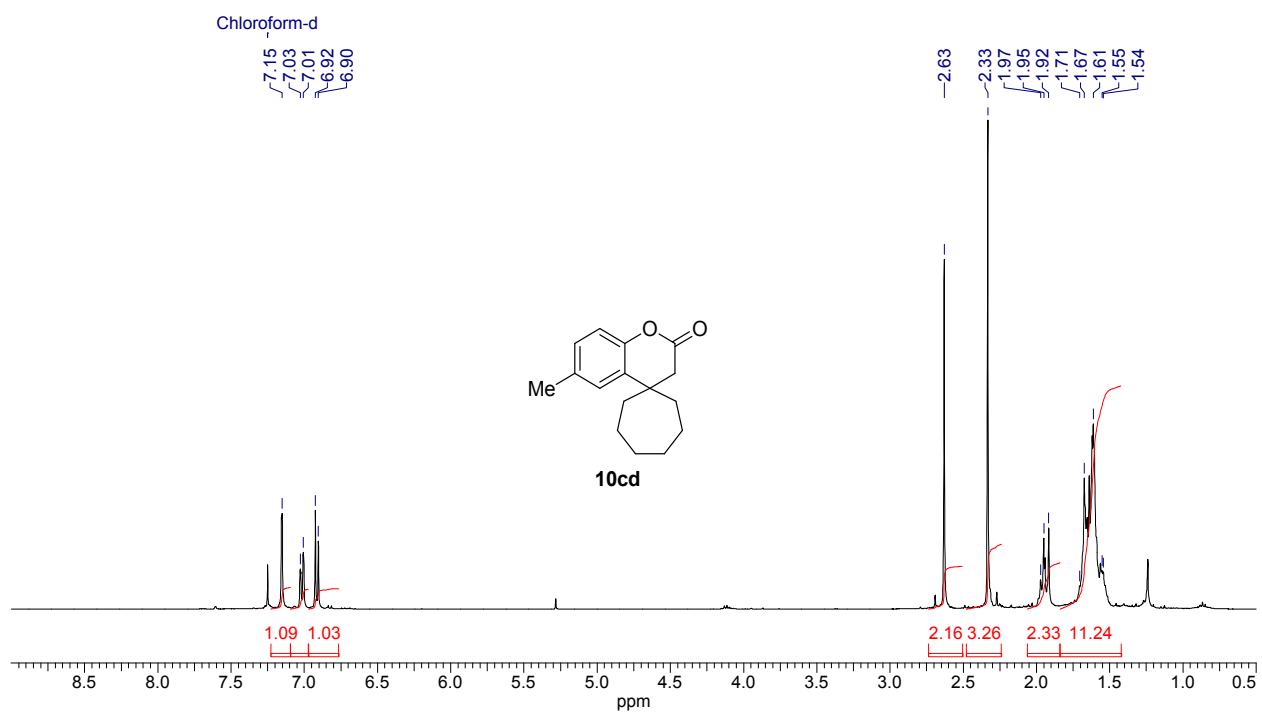

$^1\text{H}$  NMR (400 MHz) spectrum of **10cd** in  $\text{CDCl}_3$



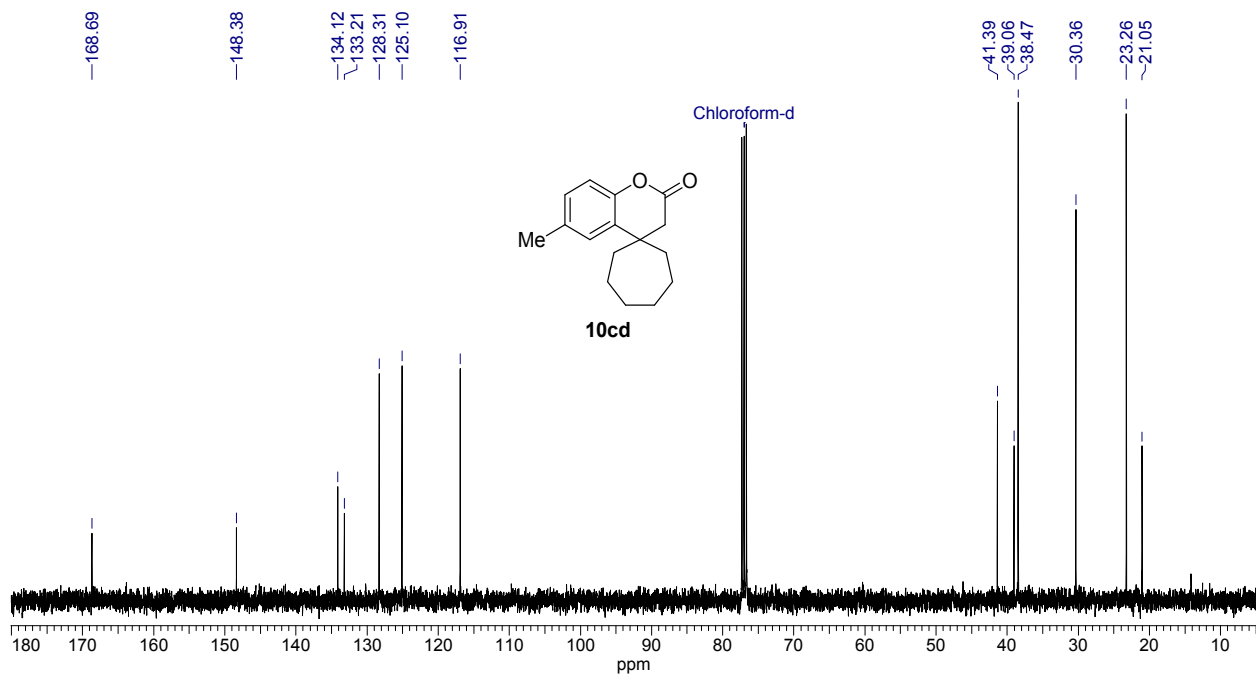

<sup>13</sup>C NMR (100 MHz) spectrum of **10cd** in CDCl<sub>3</sub>

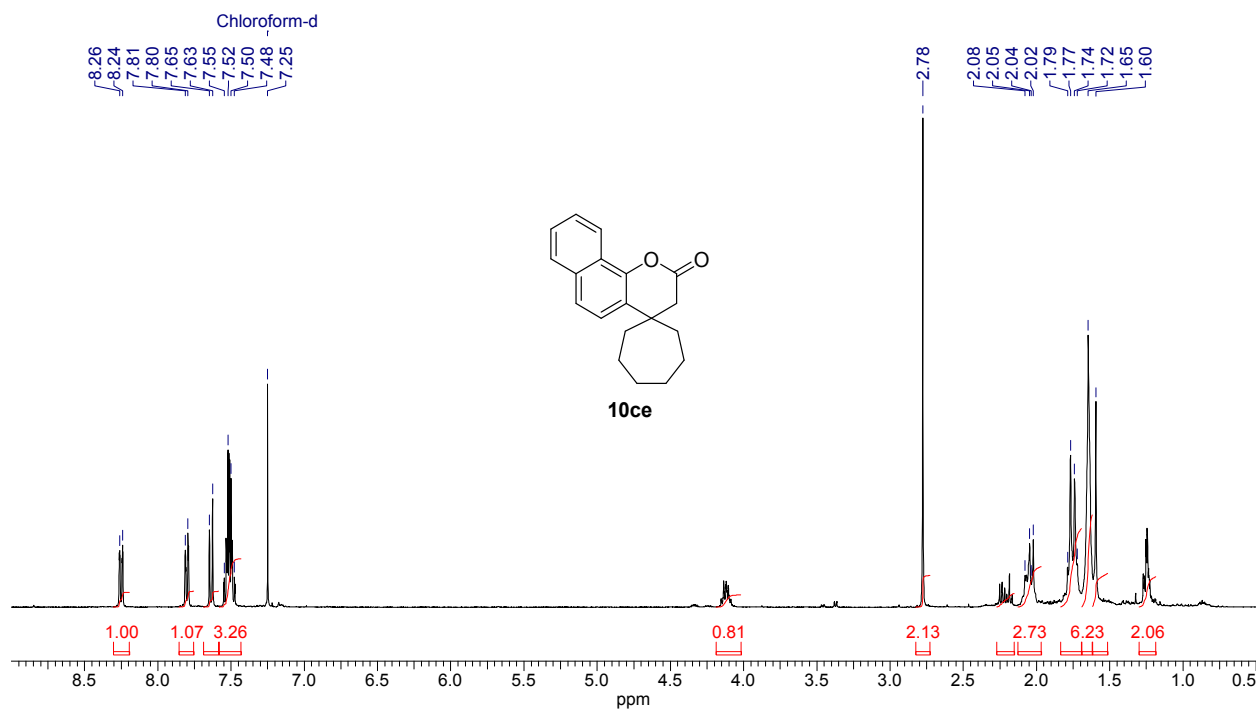

<sup>1</sup>H NMR (400 MHz) spectrum of **10ce** in CDCl<sub>3</sub>

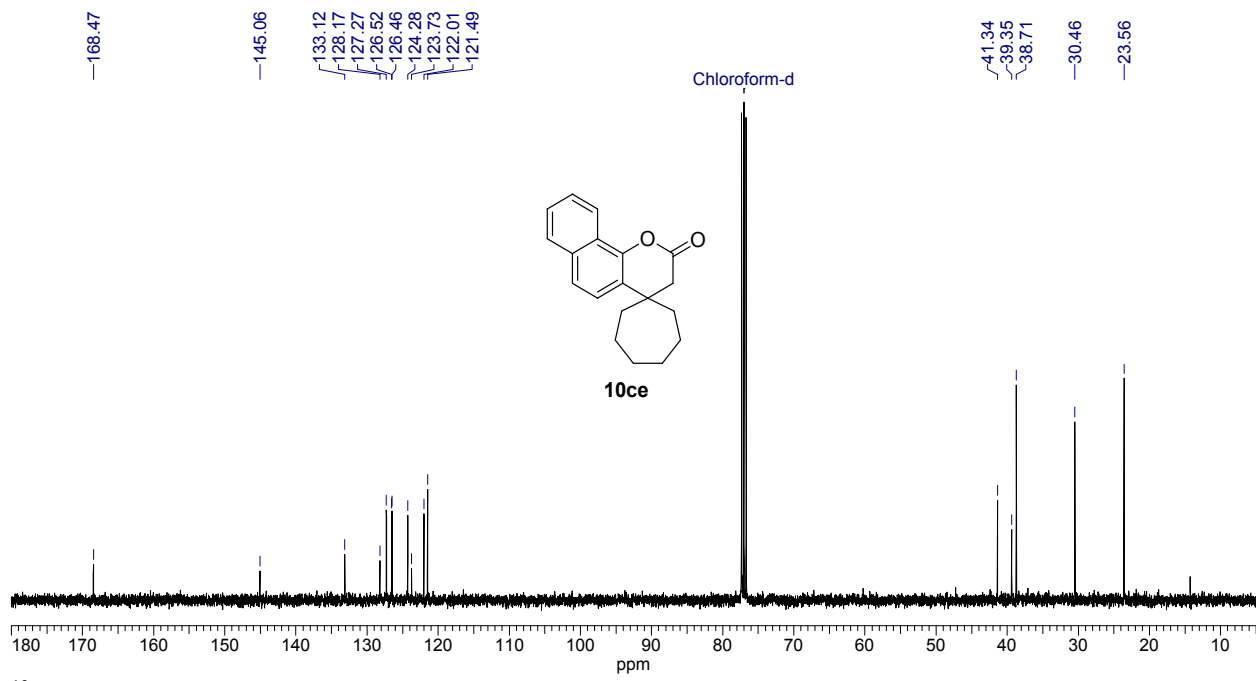

<sup>13</sup>C NMR (100 MHz) spectrum of **10ce** in CDCl<sub>3</sub>

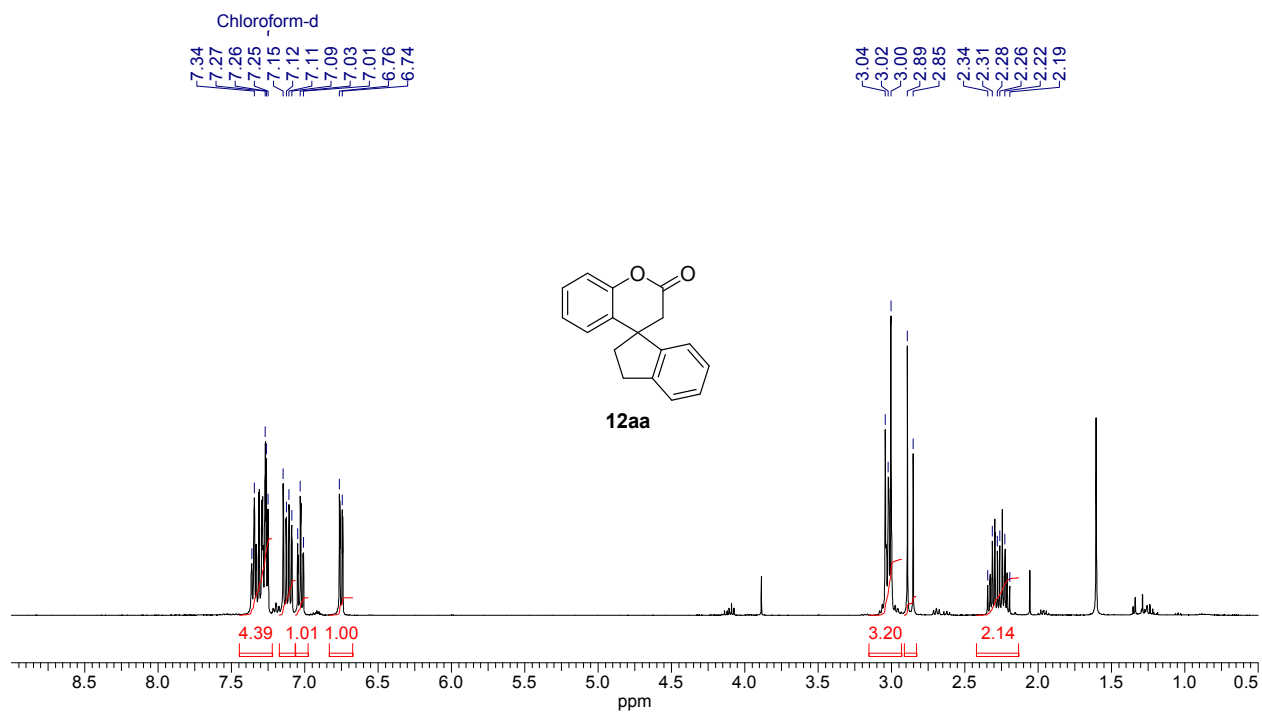

<sup>1</sup>H NMR (400 MHz) spectrum of **12aa** in CDCl<sub>3</sub>

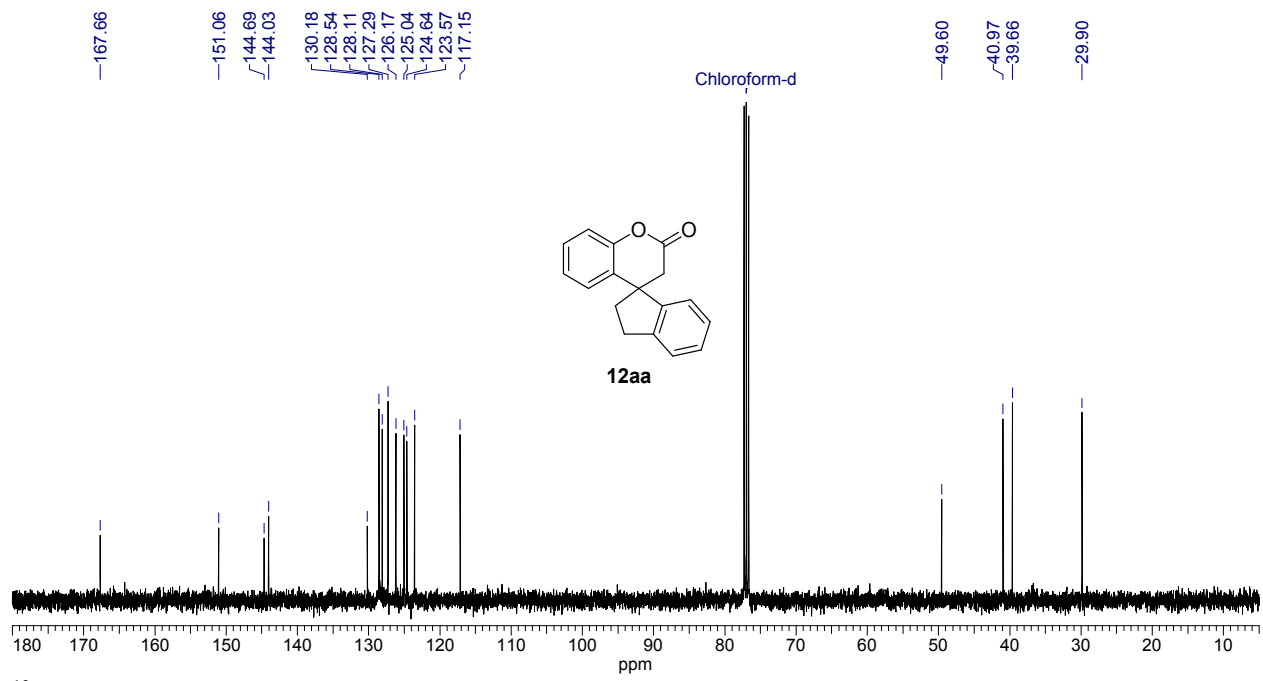

**13C NMR (100 MHz) spectrum of 12aa in CDCl<sub>3</sub>**

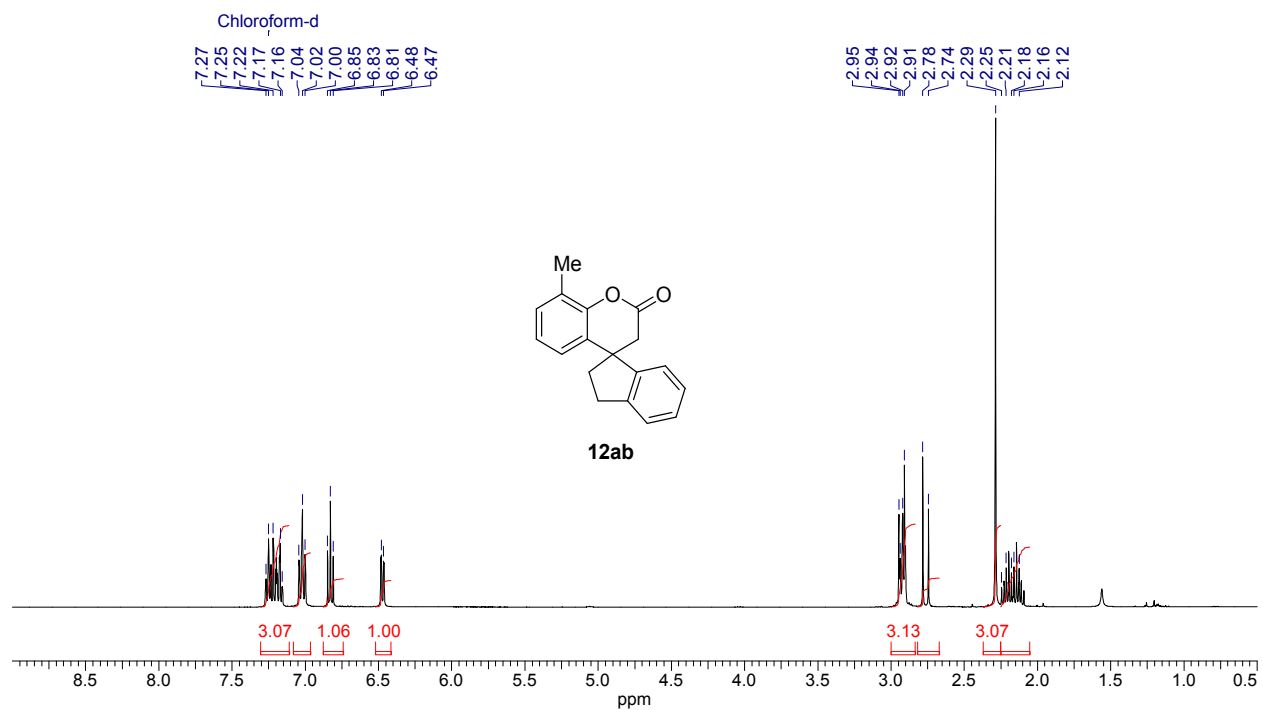

**1H NMR (400 MHz) spectrum of 12ab in CDCl<sub>3</sub>**

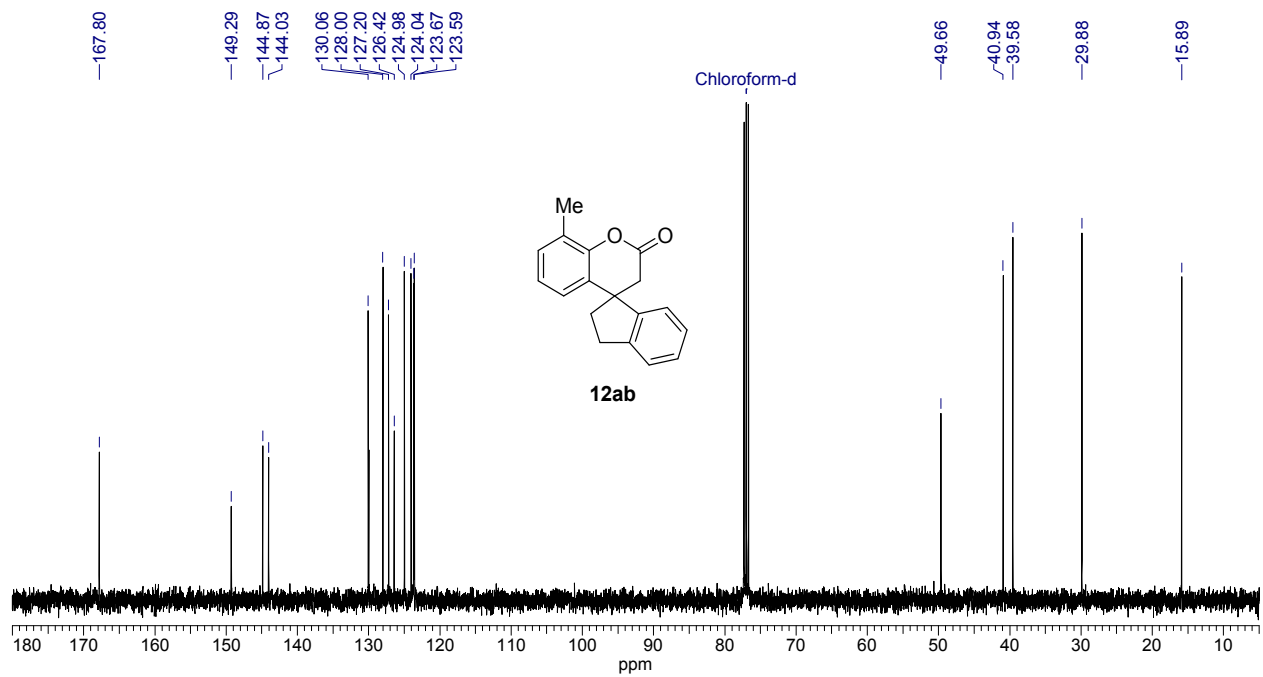

<sup>13</sup>C NMR (100 MHz) spectrum of **12ab** in CDCl<sub>3</sub>

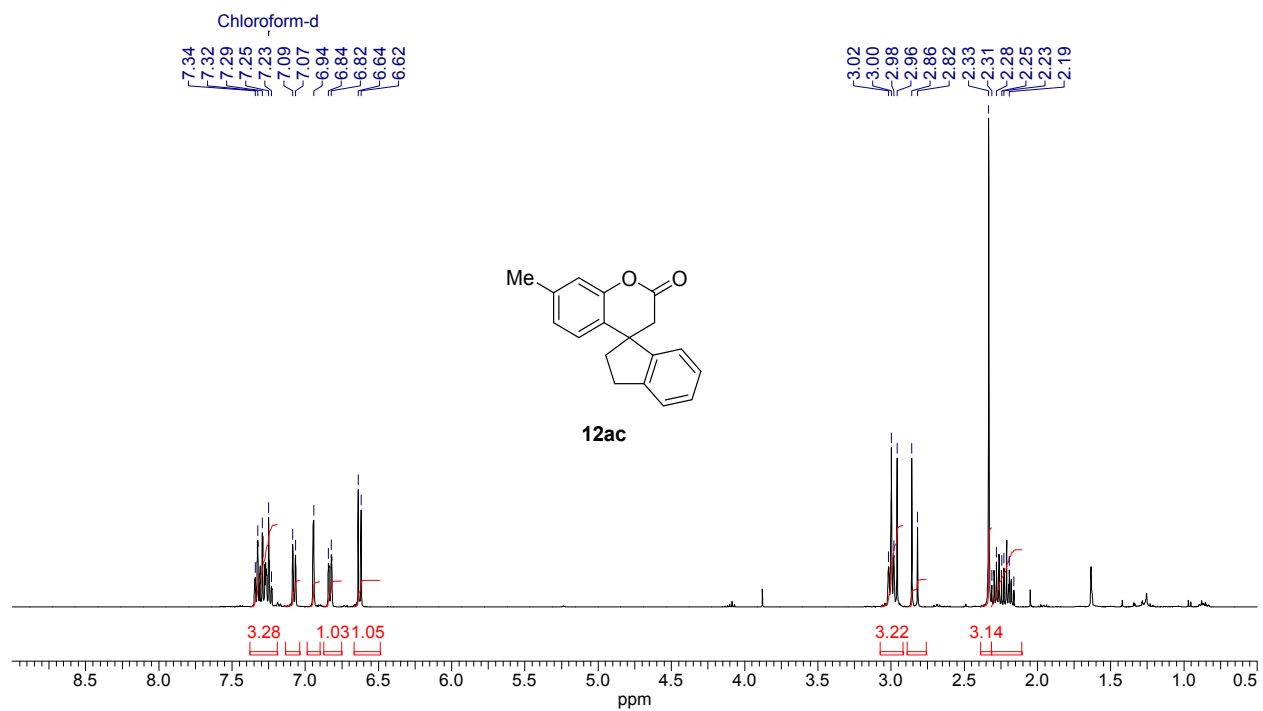

<sup>1</sup>H NMR (400 MHz) spectrum of **12ac** in CDCl<sub>3</sub>

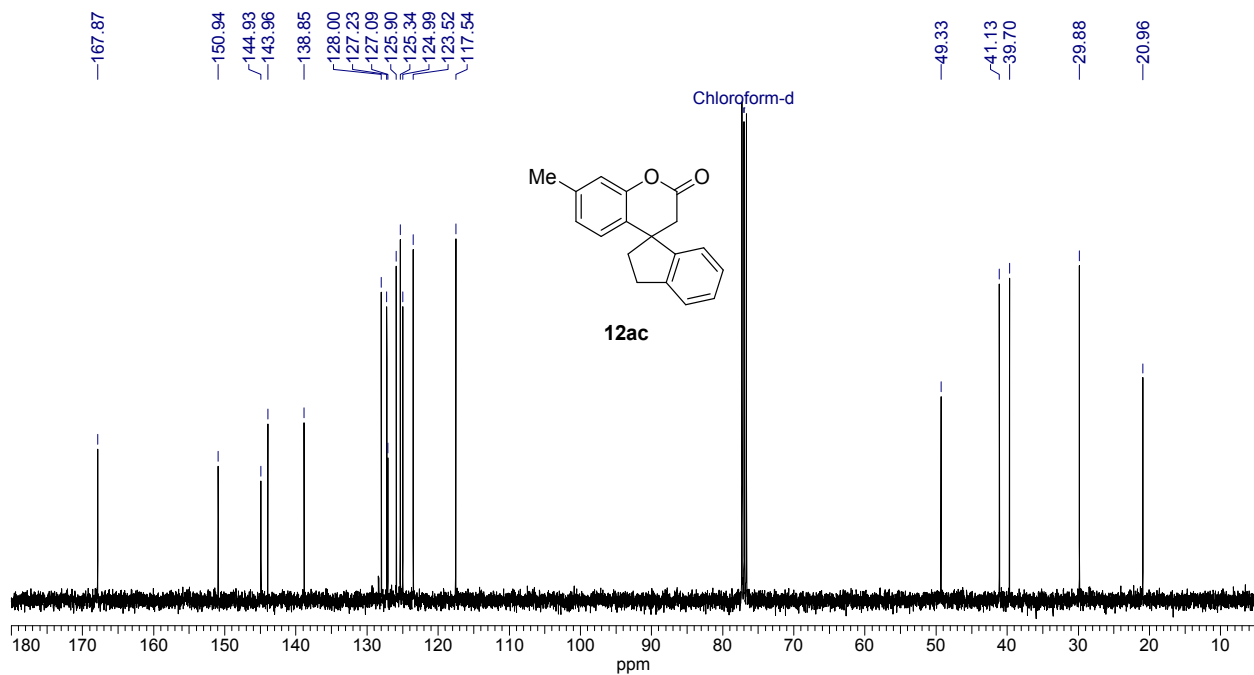

<sup>13</sup>C NMR (100 MHz) spectrum of **12ac** in CDCl<sub>3</sub>

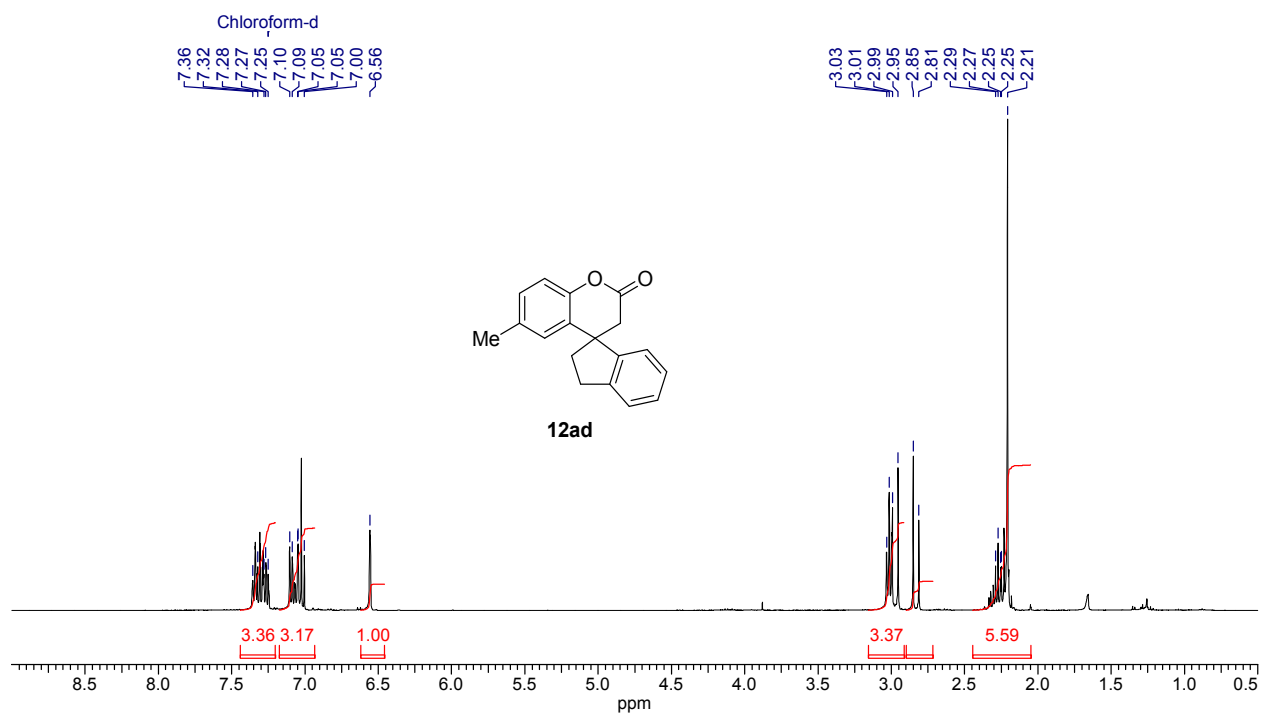

<sup>1</sup>H NMR (400 MHz) spectrum of **12ad** in CDCl<sub>3</sub>

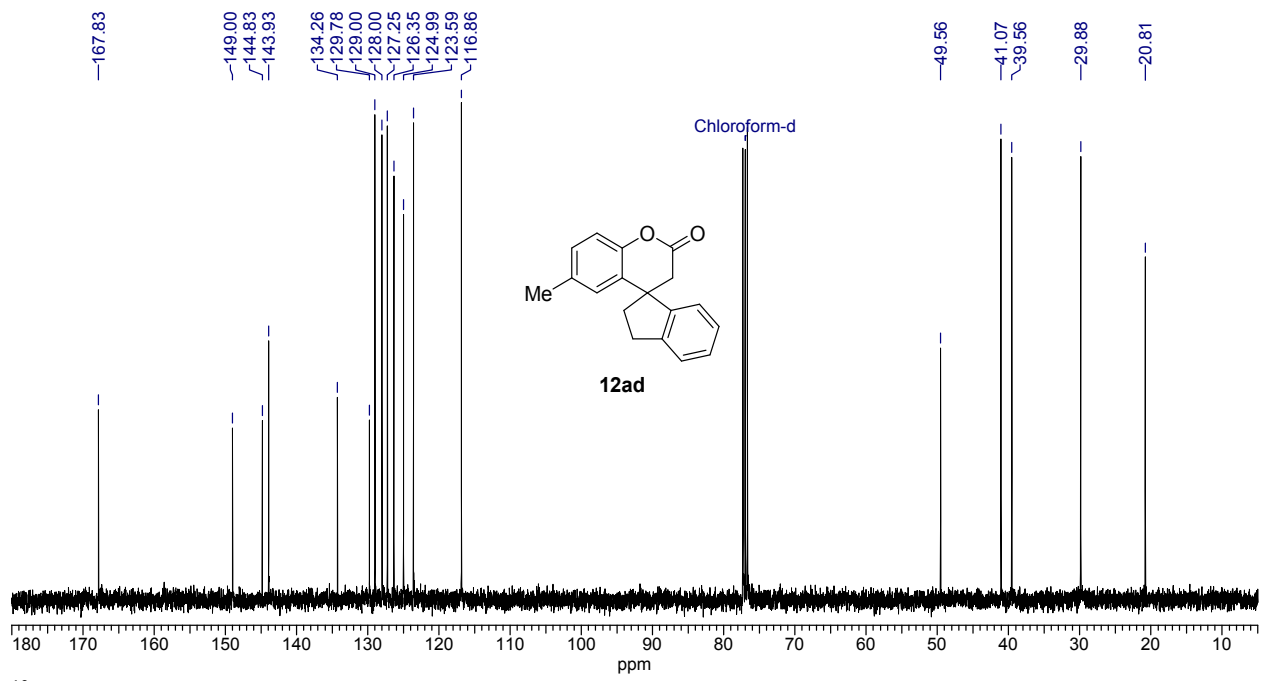

<sup>13</sup>C NMR (100 MHz) spectrum of **12ad** in CDCl<sub>3</sub>

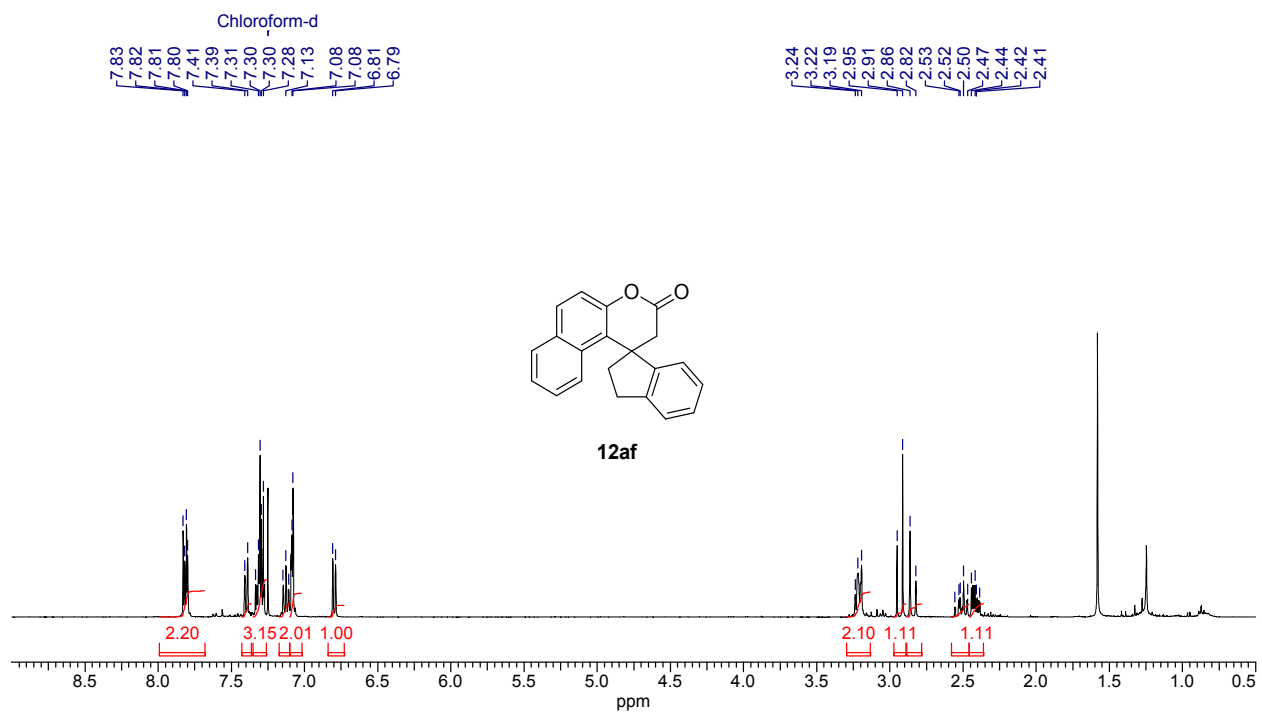

<sup>1</sup>H NMR (400 MHz) spectrum of **12af** in CDCl<sub>3</sub>

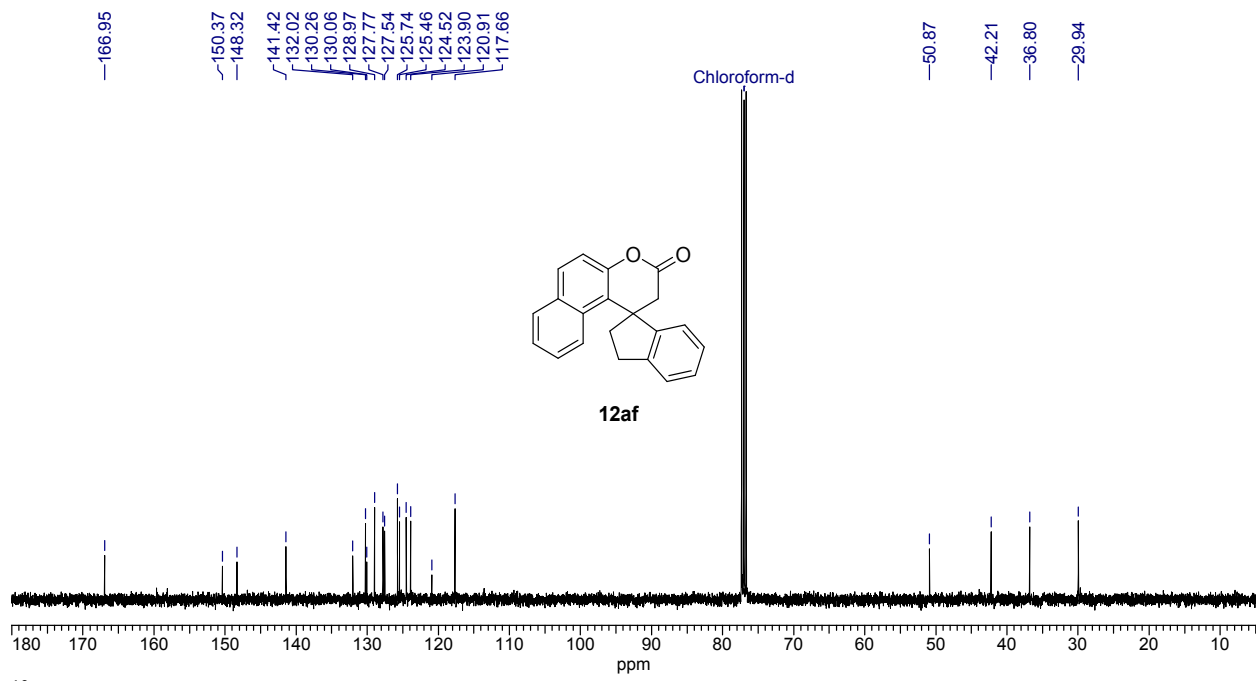

<sup>13</sup>C NMR (100 MHz) spectrum of **12af** in CDCl<sub>3</sub>

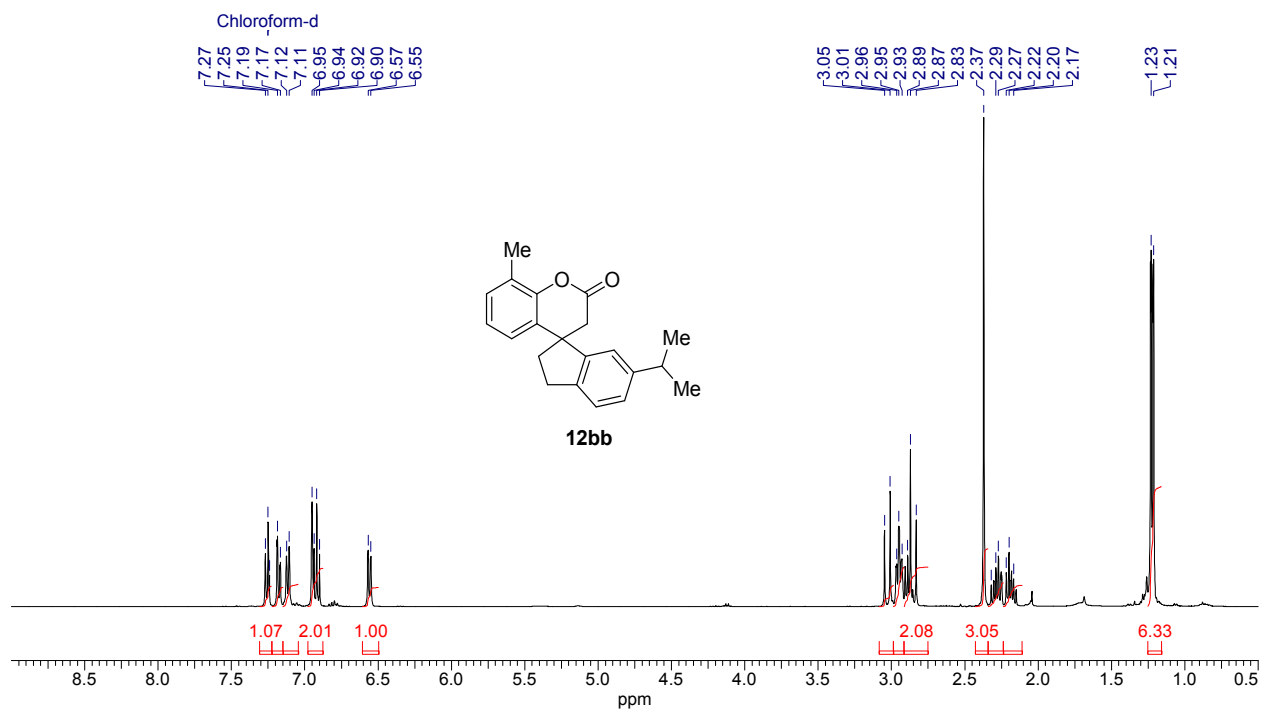

<sup>1</sup>H NMR (400 MHz) spectrum of **12bb** in CDCl<sub>3</sub>

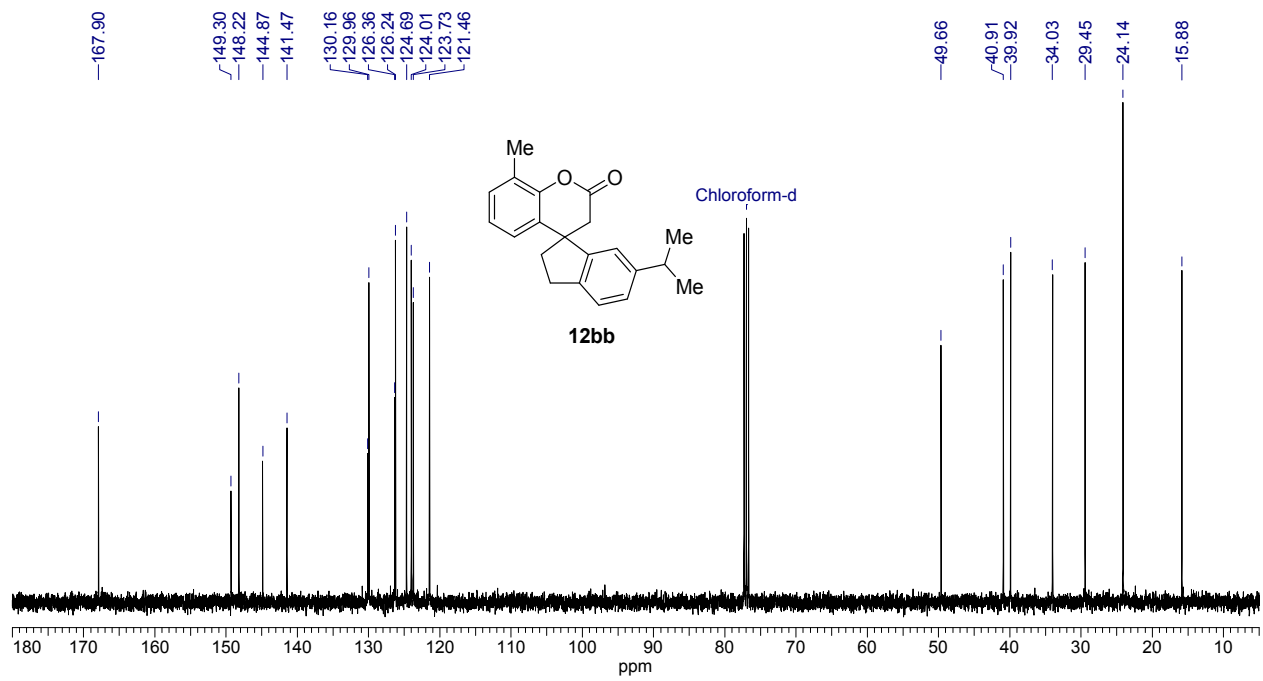

**13C NMR (100 MHz) spectrum of 12bb in CDCl<sub>3</sub>**

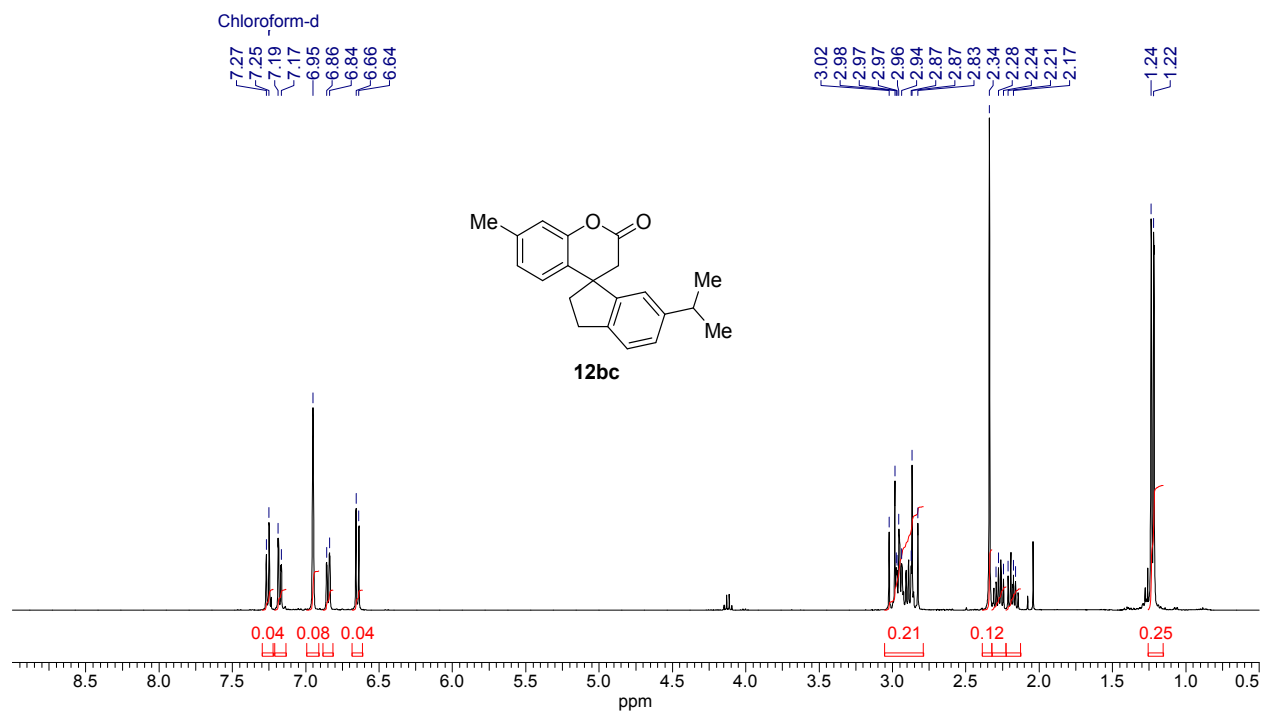

**1H NMR (400 MHz) spectrum of 12bc in CDCl<sub>3</sub>**



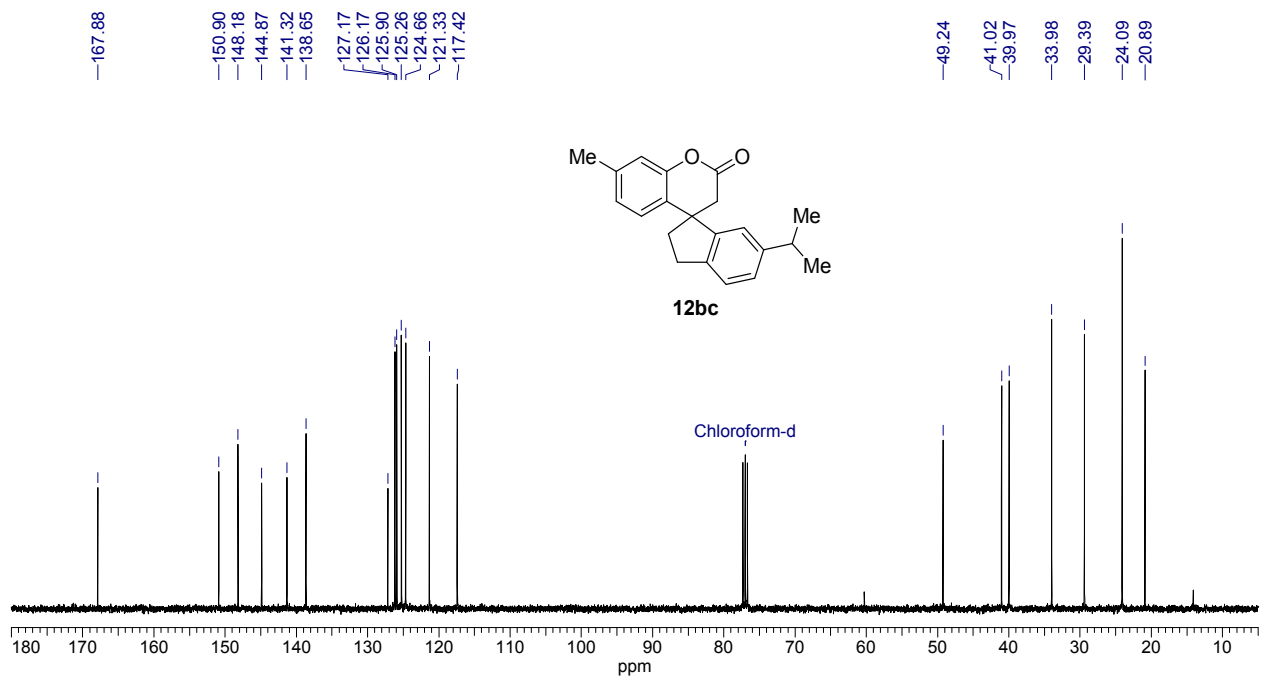

<sup>13</sup>C NMR (100 MHz) spectrum of **12bc** in CDCl<sub>3</sub>

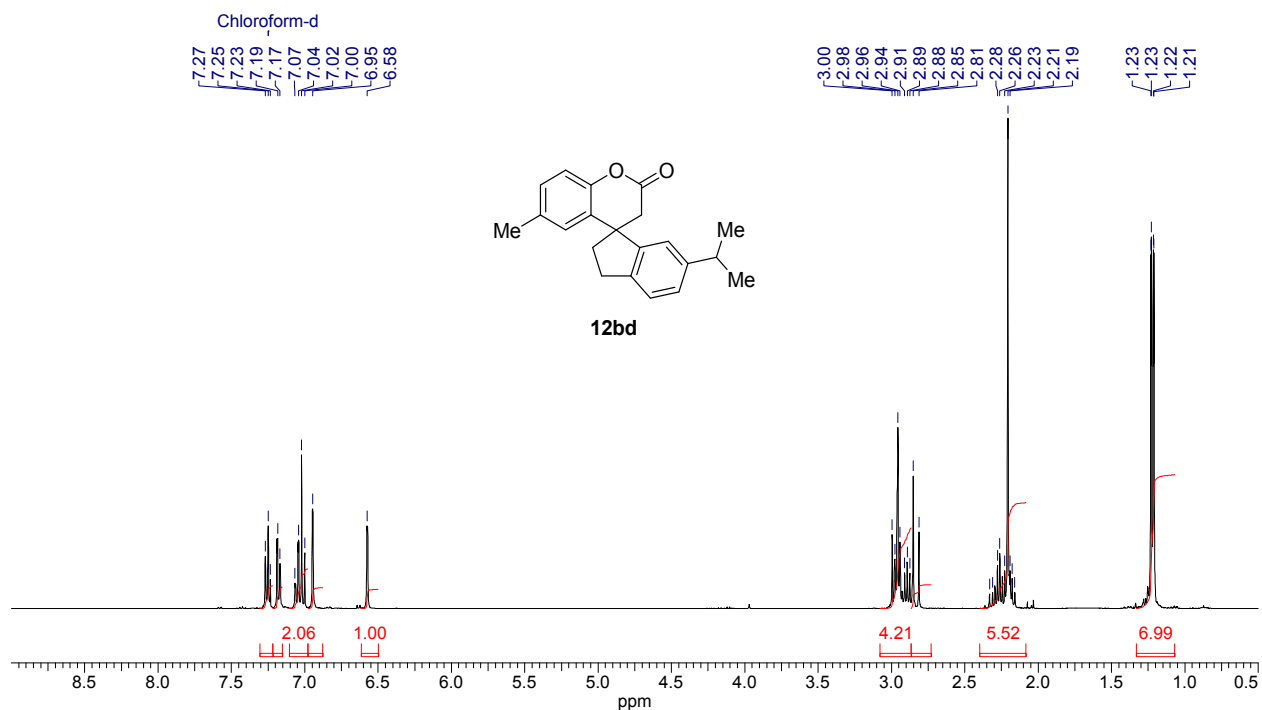

<sup>1</sup>H NMR (400 MHz) spectrum of **12bd** in CDCl<sub>3</sub>

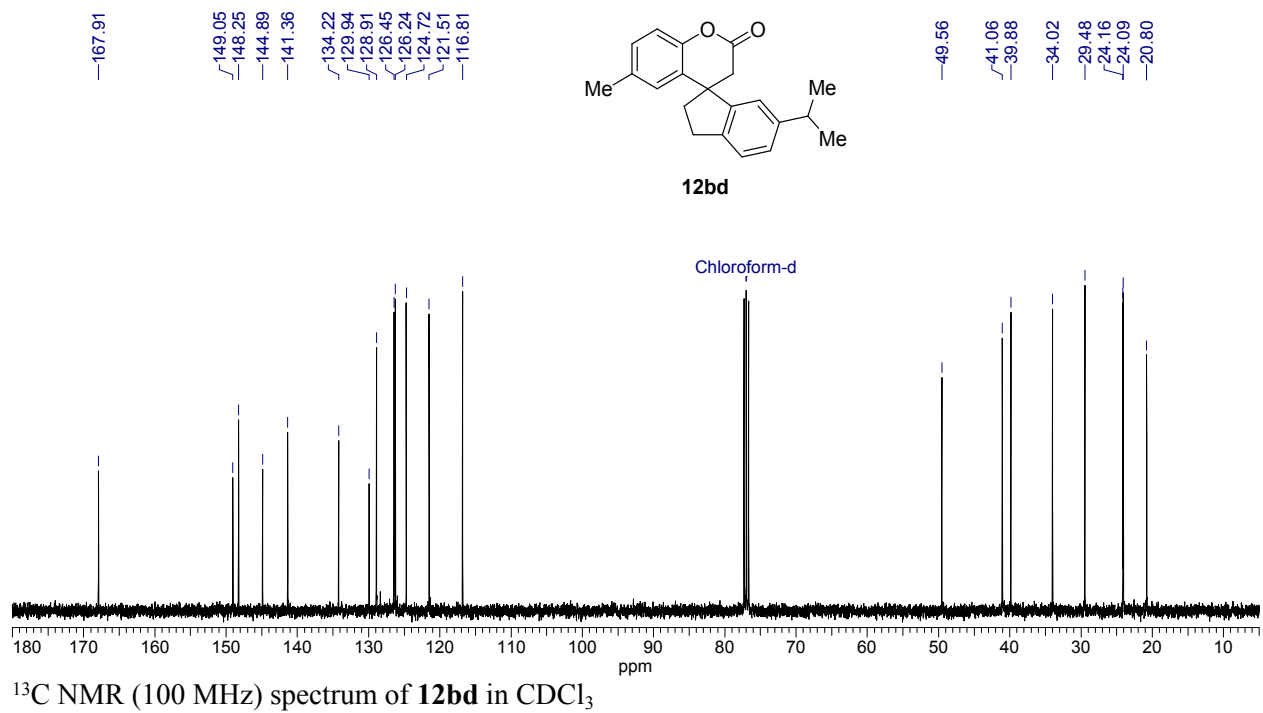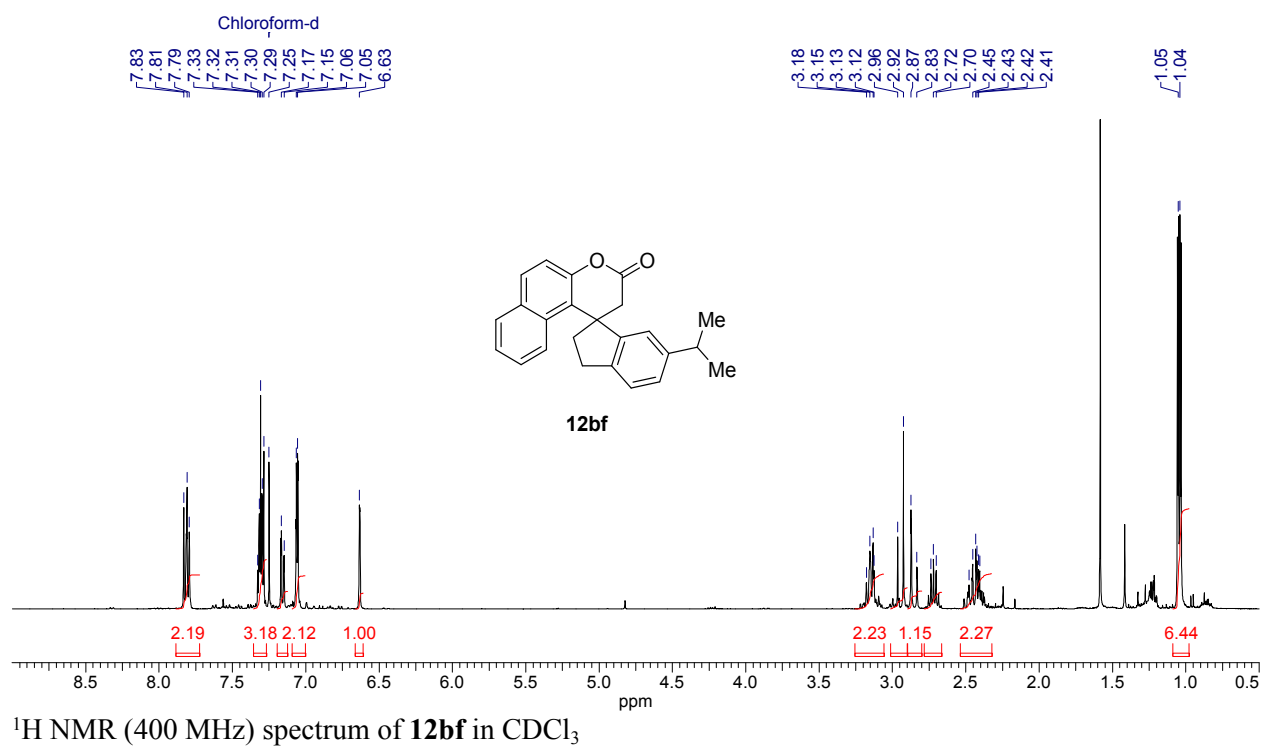

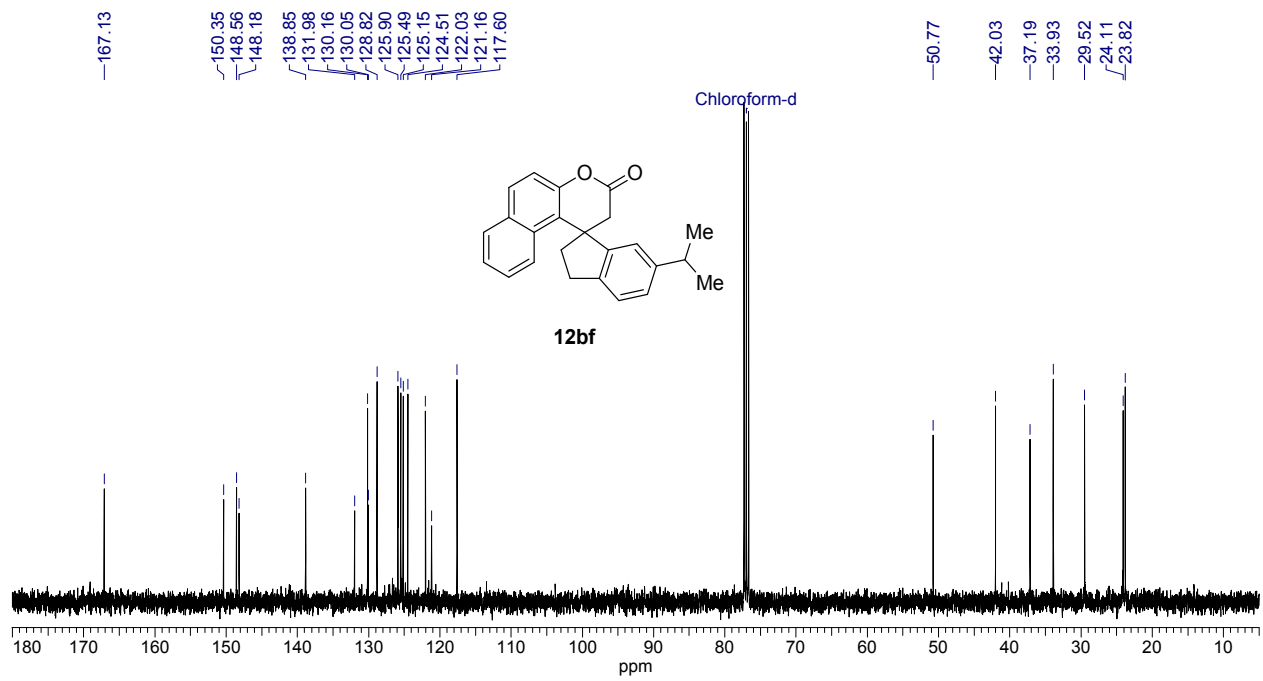

<sup>13</sup>C NMR (100 MHz) spectrum of **12bf** in CDCl<sub>3</sub>

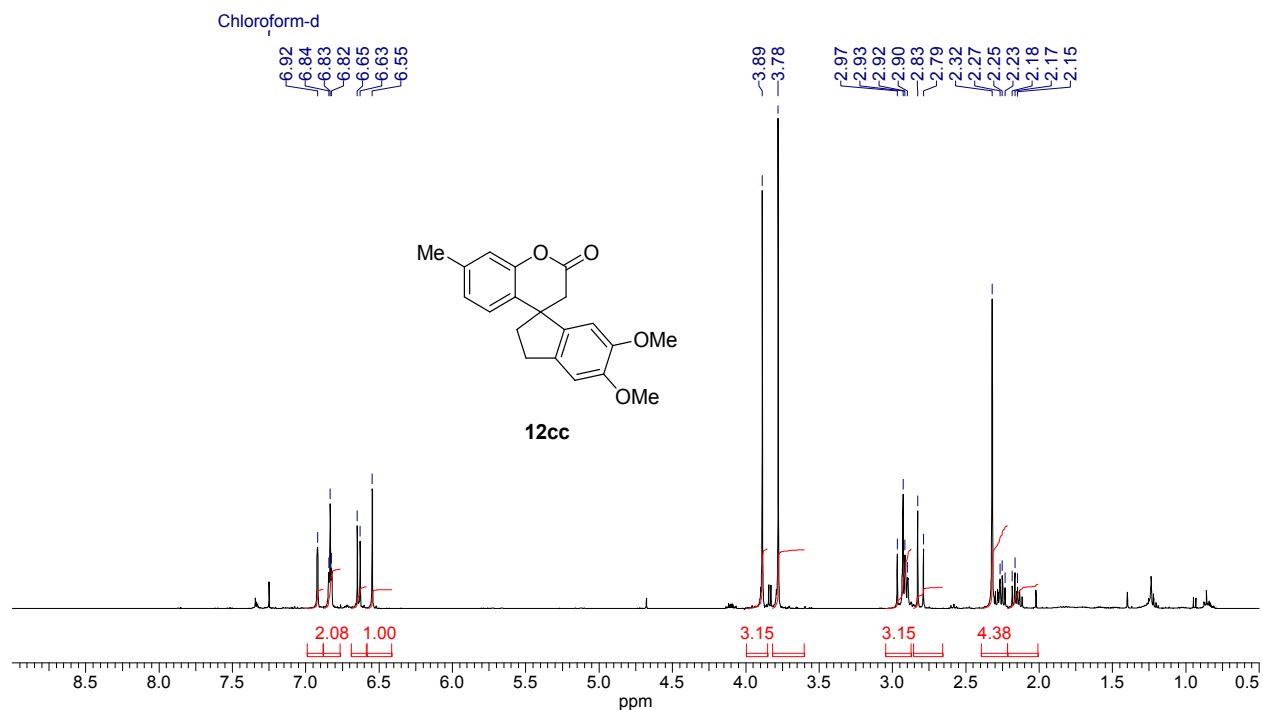

<sup>1</sup>H NMR (400 MHz) spectrum of **12cc** in CDCl<sub>3</sub>

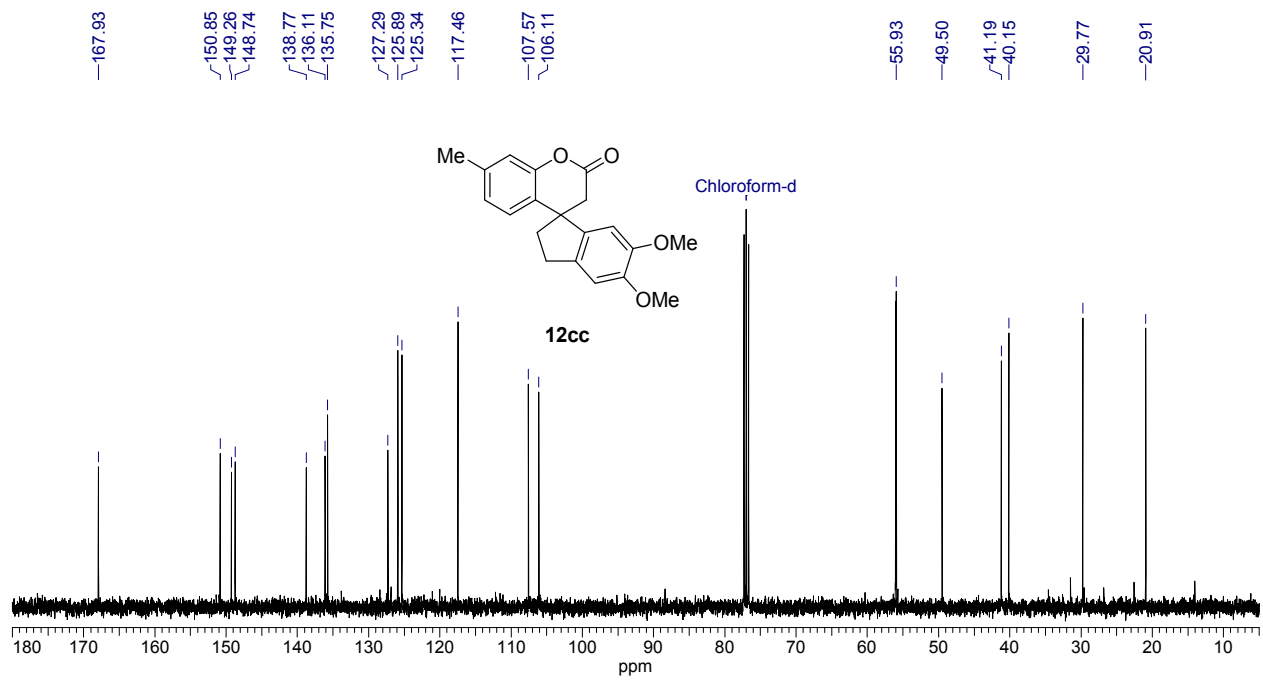

$^{13}\text{C}$  NMR (100 MHz) spectrum of **12cc** in  $\text{CDCl}_3$

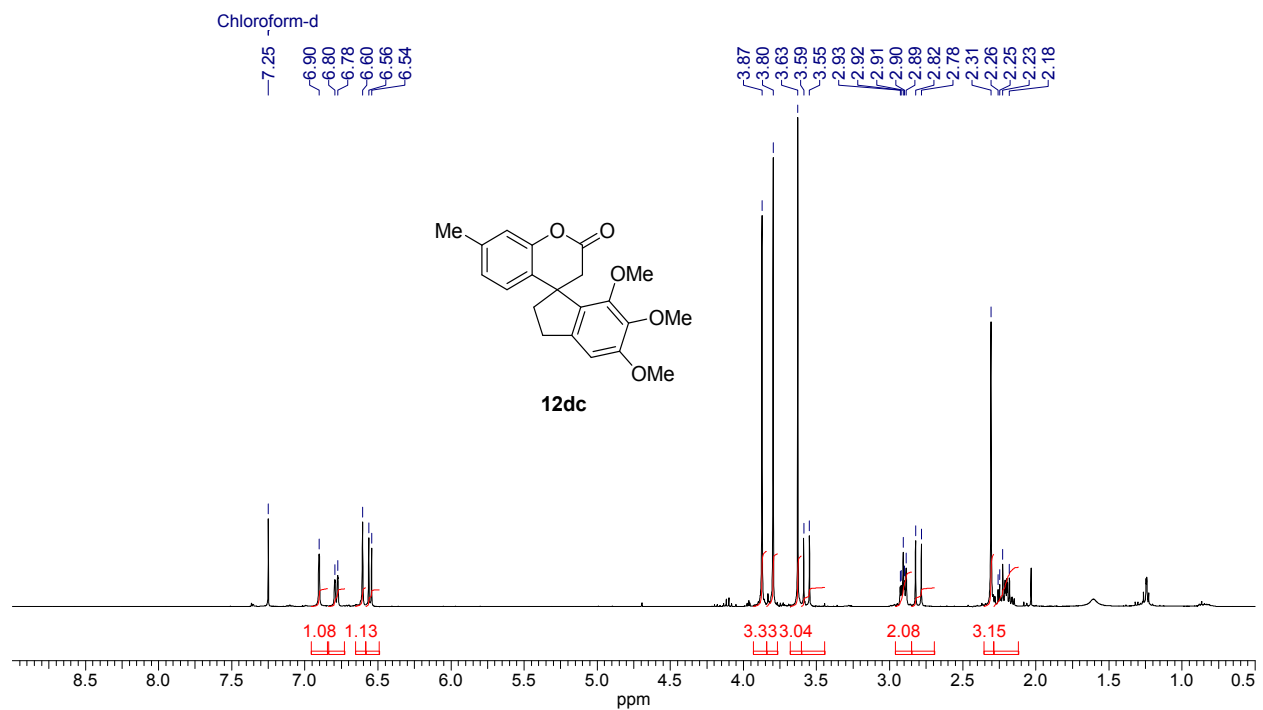

$^1\text{H}$  NMR (400 MHz) spectrum of **12dc** in  $\text{CDCl}_3$

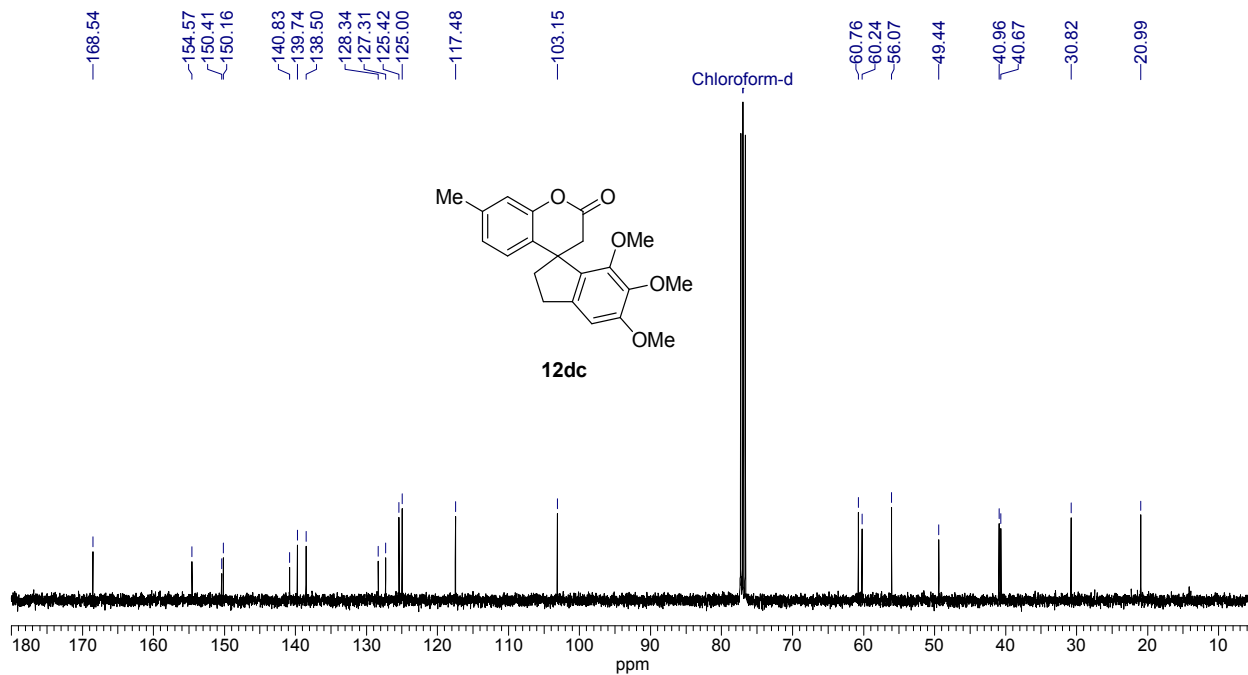

<sup>13</sup>C NMR (100 MHz) spectrum of **12dc** in CDCl<sub>3</sub>

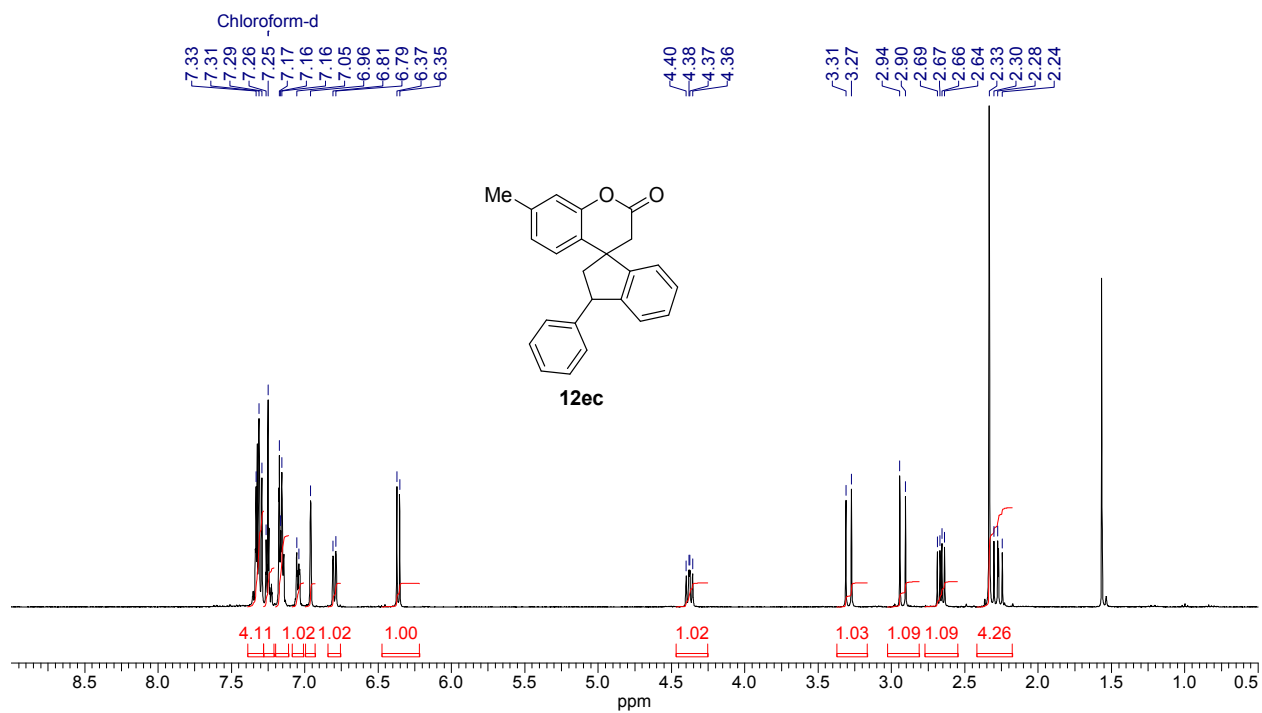

<sup>1</sup>H NMR (400 MHz) spectrum of **12ec** in CDCl<sub>3</sub>

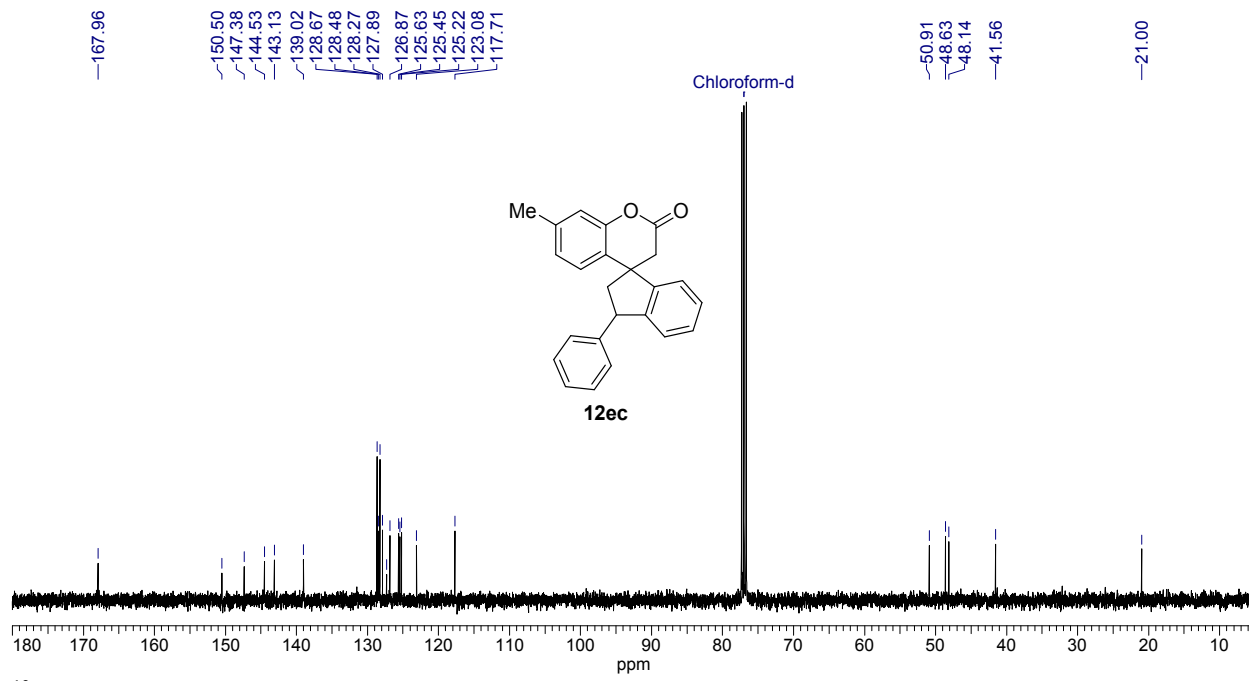

Supplement: c5ra22684h1.pdf [file c5ra22684h1.pdf]
